# Supplementary material for: DYRK1A reinforces epithelial-mesenchymal transition and metastasis of hepatocellular carcinoma via cooperatively activating STAT3 and SMAD
Source: PubMed Central journal article supplement (PMC9164892; doi:10.1186/s12929-022-00817-y), 2022-06-02
Supplement: 12929_2022_817_MOESM7_ESM.pdf [file 12929_2022_817_MOESM7_ESM.pdf]

Supplementary Table 2: Overrepresentation Enrichment Analysis of DYRK1A in HCC clinical samples

## Biological process(BP)

| geneSet    | description                                             | size | overlap | expect | enrichment Ratio | pValue | FDR |
|------------|---------------------------------------------------------|------|---------|--------|------------------|--------|-----|
| GO:0051056 | regulation of small GTPase mediated signal transduction | 316  | 198     | 123.6  | 1.60             | 0      | 0   |
| GO:0007264 | small GTPase mediated signal transduction               | 526  | 315     | 205.8  | 1.53             | 0      | 0   |
| GO:0007265 | Ras protein signal transduction                         | 413  | 246     | 161.6  | 1.52             | 0      | 0   |
| GO:0120031 | plasma membrane bounded cell projection assembly        | 508  | 298     | 198.7  | 1.50             | 0      | 0   |
| GO:0030031 | cell projection assembly                                | 520  | 302     | 203.4  | 1.48             | 0      | 0   |
| GO:0007507 | heart development                                       | 512  | 293     | 200.3  | 1.46             | 0      | 0   |
| GO:0030334 | regulation of cell migration                            | 741  | 414     | 289.9  | 1.43             | 0      | 0   |
| GO:0000902 | cell morphogenesis                                      | 939  | 517     | 367.3  | 1.41             | 0      | 0   |
| GO:0000904 | cell morphogenesis involved in differentiation          | 683  | 376     | 267.2  | 1.41             | 0      | 0   |
| GO:0007017 | microtubule-based process                               | 640  | 352     | 250.4  | 1.41             | 0      | 0   |
| GO:0051270 | regulation of cellular component movement               | 868  | 475     | 339.5  | 1.40             | 0      | 0   |
| GO:0120036 | plasma membrane bounded cell projection organization    | 1355 | 741     | 530.1  | 1.40             | 0      | 0   |
| GO:2000145 | regulation of cell motility                             | 793  | 433     | 310.2  | 1.40             | 0      | 0   |
| GO:0030030 | cell projection organization                            | 1387 | 757     | 542.6  | 1.40             | 0      | 0   |
| GO:0035239 | tube morphogenesis                                      | 774  | 421     | 302.8  | 1.39             | 0      | 0   |
| GO:0032989 | cellular component morphogenesis                        | 1033 | 560     | 404.1  | 1.39             | 0      | 0   |
| GO:0040012 | regulation of locomotion                                | 866  | 469     | 338.8  | 1.38             | 0      | 0   |
| GO:0072359 | circulatory system development                          | 972  | 526     | 380.2  | 1.38             | 0      | 0   |
| GO:0031175 | neuron projection development                           | 885  | 475     | 346.2  | 1.37             | 0      | 0   |
| GO:0051960 | regulation of nervous system development                | 821  | 440     | 321.2  | 1.37             | 0      | 0   |
| GO:0035295 | tube development                                        | 949  | 508     | 371.2  | 1.37             | 0      | 0   |
| GO:0060284 | regulation of cell development                          | 838  | 445     | 327.8  | 1.36             | 0      | 0   |
| GO:0044087 | regulation of cellular component biogenesis             | 862  | 455     | 337.2  | 1.35             | 0      | 0   |
| GO:0048666 | neuron development                                      | 1005 | 528     | 393.1  | 1.34             | 0      | 0   |
| GO:0051726 | regulation of cell cycle                                | 1023 | 537     | 400.2  | 1.34             | 0      | 0   |
| GO:0022008 | neurogenesis                                            | 1455 | 758     | 569.2  | 1.33             | 0      | 0   |
| GO:0022610 | biological adhesion                                     | 1300 | 676     | 508.5  | 1.33             | 0      | 0   |
| GO:0007010 | cytoskeleton organization                               | 1181 | 614     | 462.0  | 1.33             | 0      | 0   |
| GO:0007155 | cell adhesion                                           | 1293 | 672     | 505.8  | 1.33             | 0      | 0   |
| GO:0048699 | generation of neurons                                   | 1364 | 706     | 533.6  | 1.32             | 0      | 0   |
| GO:0016477 | cell migration                                          | 1271 | 654     | 497.2  | 1.32             | 0      | 0   |
| GO:0030182 | neuron differentiation                                  | 1233 | 634     | 482.3  | 1.31             | 0      | 0   |
| GO:0022402 | cell cycle process                                      | 1137 | 581     | 444.8  | 1.31             | 0      | 0   |
| GO:0006928 | movement of cell or subcellular component               | 1815 | 924     | 710.0  | 1.30             | 0      | 0   |
| GO:0007049 | cell cycle                                              | 1577 | 802     | 616.9  | 1.30             | 0      | 0   |
| GO:0048468 | cell development                                        | 1937 | 984     | 757.7  | 1.30             | 0      | 0   |
| GO:0071495 | cellular response to endogenous stimulus                | 1271 | 644     | 497.2  | 1.30             | 0      | 0   |
| GO:0031327 | negative regulation of cellular biosynthetic process    | 1400 | 708     | 547.7  | 1.29             | 0      | 0   |
| GO:0045595 | regulation of cell differentiation                      | 1575 | 793     | 616.1  | 1.29             | 0      | 0   |
| GO:2000026 | regulation of multicellular organismal development      | 1774 | 893     | 694.0  | 1.29             | 0      | 0   |

|            |                                                                         |      |     |       |      |   |   |
|------------|-------------------------------------------------------------------------|------|-----|-------|------|---|---|
| GO:0009890 | negative regulation of biosynthetic process                             | 1423 | 715 | 556.7 | 1.28 | 0 | 0 |
| GO:0045893 | positive regulation of transcription, DNA-templated                     | 1430 | 716 | 559.4 | 1.28 | 0 | 0 |
| GO:0048870 | cell motility                                                           | 1394 | 696 | 545.3 | 1.28 | 0 | 0 |
| GO:0051674 | localization of cell                                                    | 1394 | 696 | 545.3 | 1.28 | 0 | 0 |
| GO:0040011 | locomotion                                                              | 1603 | 796 | 627.1 | 1.27 | 0 | 0 |
| GO:0045935 | positive regulation of nucleobase-containing compound metabolic process | 1746 | 859 | 683.0 | 1.26 | 0 | 0 |
| GO:0006468 | protein phosphorylation                                                 | 1746 | 856 | 683.0 | 1.25 | 0 | 0 |
| GO:0010628 | positive regulation of gene expression                                  | 1812 | 883 | 708.8 | 1.25 | 0 | 0 |
| GO:0010557 | positive regulation of macromolecule biosynthetic process               | 1737 | 846 | 679.5 | 1.25 | 0 | 0 |
| GO:1902531 | regulation of intracellular signal transduction                         | 1709 | 832 | 668.5 | 1.24 | 0 | 0 |

---

Molecular function(MF)

---

| geneSet    | description                                                           | size | overlap | expect | enrichment Ratio | pValue | FDR   |
|------------|-----------------------------------------------------------------------|------|---------|--------|------------------|--------|-------|
| GO:0005089 | Rho guanyl-nucleotide exchange factor activity                        | 75   | 53      | 28.5   | 1.86             | 9E-09  | 6E-07 |
| GO:0019783 | ubiquitin-like protein-specific protease activity                     | 105  | 69      | 39.9   | 1.73             | 7E-09  | 5E-07 |
| GO:0017048 | Rho GTPase binding                                                    | 162  | 102     | 61.6   | 1.66             | 9E-11  | 8E-09 |
| GO:0005201 | extracellular matrix structural constituent                           | 151  | 94      | 57.4   | 1.64             | 1E-09  | 8E-08 |
| GO:0005088 | Ras guanyl-nucleotide exchange factor activity                        | 241  | 145     | 91.6   | 1.58             | 2E-12  | 2E-10 |
| GO:0005085 | guanyl-nucleotide exchange factor activity                            | 306  | 181     | 116.3  | 1.56             | 3E-14  | 4E-12 |
| GO:0005096 | GTPase activator activity                                             | 258  | 151     | 98.1   | 1.54             | 1E-11  | 1E-09 |
| GO:0004674 | protein serine/threonine kinase activity                              | 427  | 249     | 162.3  | 1.53             | 0      | 0     |
| GO:0004672 | protein kinase activity                                               | 616  | 353     | 234.1  | 1.51             | 0      | 0     |
| GO:0030695 | GTPase regulator activity                                             | 288  | 165     | 109.5  | 1.51             | 2E-11  | 2E-09 |
| GO:0017016 | Ras GTPase binding                                                    | 497  | 284     | 188.9  | 1.50             | 0      | 0     |
| GO:0031267 | small GTPase binding                                                  | 514  | 293     | 195.4  | 1.50             | 0      | 0     |
| GO:0003700 | DNA-binding transcription factor activity                             | 1620 | 922     | 615.7  | 1.50             | 0      | 0     |
| GO:0000981 | DNA-binding transcription factor activity, RNA polymerase II-specific | 1525 | 866     | 579.6  | 1.49             | 0      | 0     |
| GO:0003682 | chromatin binding                                                     | 495  | 281     | 188.1  | 1.49             | 0      | 0     |
| GO:0016773 | phosphotransferase activity, alcohol group as acceptor                | 742  | 414     | 282.0  | 1.47             | 0      | 0     |
| GO:0051020 | GTPase binding                                                        | 599  | 333     | 227.7  | 1.46             | 0      | 0     |
| GO:0140110 | transcription regulator activity                                      | 1923 | 1065    | 730.9  | 1.46             | 0      | 0     |
| GO:0060589 | nucleoside-triphosphatase regulator activity                          | 330  | 180     | 125.4  | 1.44             | 5E-10  | 4E-08 |
| GO:0016301 | kinase activity                                                       | 800  | 436     | 304.1  | 1.43             | 0      | 0     |
| GO:0004842 | ubiquitin-protein transferase activity                                | 380  | 206     | 144.4  | 1.43             | 6E-11  | 6E-09 |
| GO:0019787 | ubiquitin-like protein transferase activity                           | 404  | 217     | 153.5  | 1.41             | 6E-11  | 6E-09 |
| GO:0016772 | transferase activity, transferring phosphorus-containing groups       | 931  | 484     | 353.8  | 1.37             | 0E+00  | 0E+00 |
| GO:0016887 | ATPase activity                                                       | 406  | 211     | 154.3  | 1.37             | 5E-09  | 3E-07 |
| GO:0019901 | protein kinase binding                                                | 603  | 308     | 229.2  | 1.34             | 2E-11  | 2E-09 |
| GO:0008092 | cytoskeletal protein binding                                          | 887  | 452     | 337.1  | 1.34             | 4E-16  | 6E-14 |

|            |                                                               |      |     |       |      |       |       |
|------------|---------------------------------------------------------------|------|-----|-------|------|-------|-------|
| GO:0005524 | ATP binding                                                   | 1380 | 700 | 524.5 | 1.33 | 0E+00 | 0E+00 |
| GO:0019900 | kinase binding                                                | 676  | 342 | 256.9 | 1.33 | 7E-12 | 7E-10 |
| GO:0032559 | adenyl ribonucleotide binding                                 | 1432 | 722 | 544.3 | 1.33 | 0E+00 | 0E+00 |
| GO:0008134 | transcription factor binding                                  | 622  | 313 | 236.4 | 1.32 | 1E-10 | 1E-08 |
| GO:0003712 | transcription coregulator activity                            | 523  | 263 | 198.8 | 1.32 | 4E-09 | 3E-07 |
| GO:0030554 | adenyl nucleotide binding                                     | 1445 | 724 | 549.2 | 1.32 | 0E+00 | 0E+00 |
| GO:0019904 | protein domain specific binding                               | 663  | 328 | 252.0 | 1.30 | 5E-10 | 4E-08 |
| GO:0001067 | regulatory region nucleic acid binding                        | 868  | 429 | 329.9 | 1.30 | 1E-12 | 1E-10 |
| GO:0044212 | transcription regulatory region DNA binding                   | 866  | 427 | 329.1 | 1.30 | 2E-12 | 2E-10 |
| GO:0000976 | transcription regulatory region sequence-specific DNA binding | 758  | 373 | 288.1 | 1.29 | 8E-11 | 7E-09 |
| GO:0003690 | double-stranded DNA binding                                   | 872  | 428 | 331.4 | 1.29 | 5E-12 | 5E-10 |
| GO:0035639 | purine ribonucleoside triphosphate binding                    | 1691 | 829 | 642.7 | 1.29 | 0E+00 | 0E+00 |
| GO:1990837 | sequence-specific double-stranded DNA binding                 | 791  | 387 | 300.6 | 1.29 | 9E-11 | 7E-09 |
| GO:0001012 | RNA polymerase II regulatory region DNA binding               | 715  | 349 | 271.8 | 1.28 | 1E-09 | 8E-08 |
| GO:0008270 | zinc ion binding                                              | 759  | 369 | 288.5 | 1.28 | 7E-10 | 5E-08 |
| GO:0032555 | purine ribonucleotide binding                                 | 1751 | 851 | 665.5 | 1.28 | 0E+00 | 0E+00 |
| GO:0032553 | ribonucleotide binding                                        | 1766 | 857 | 671.2 | 1.28 | 0E+00 | 0E+00 |
| GO:0017076 | purine nucleotide binding                                     | 1766 | 855 | 671.2 | 1.27 | 0E+00 | 0E+00 |
| GO:0000977 | RNA polymerase II regulatory region sequence-specific DNA     | 709  | 343 | 269.5 | 1.27 | 5E-09 | 4E-07 |
| GO:0008144 | drug binding                                                  | 1610 | 772 | 611.9 | 1.26 | 0E+00 | 0E+00 |
| GO:0017111 | nucleoside-triphosphatase activity                            | 788  | 376 | 299.5 | 1.26 | 7E-09 | 5E-07 |
| GO:0043565 | sequence-specific DNA binding                                 | 1044 | 495 | 396.8 | 1.25 | 8E-11 | 7E-09 |
| GO:0000166 | nucleotide binding                                            | 1985 | 924 | 754.4 | 1.22 | 0     | 0     |
| GO:1901265 | nucleoside phosphate binding                                  | 1986 | 924 | 754.8 | 1.22 | 0     | 0     |

Cellular component (CC)

| geneSet    | description                                  | size | overlap | expect | enrichment Ratio | pValue | FDR |
|------------|----------------------------------------------|------|---------|--------|------------------|--------|-----|
| GO:0005911 | cell-cell junction                           | 418  | 229     | 130.6  | 1.75             | 0      | 0   |
| GO:0016604 | nuclear body                                 | 665  | 364     | 207.8  | 1.75             | 0      | 0   |
| GO:0005813 | centrosome                                   | 444  | 243     | 138.8  | 1.75             | 0      | 0   |
| GO:0031252 | cell leading edge                            | 372  | 203     | 116.3  | 1.75             | 0      | 0   |
| GO:0098984 | neuron to neuron synapse                     | 320  | 174     | 100.0  | 1.74             | 0      | 0   |
| GO:0044451 | nucleoplasm part                             | 970  | 527     | 303.2  | 1.74             | 0      | 0   |
| GO:0044441 | ciliary part                                 | 370  | 201     | 115.6  | 1.74             | 0      | 0   |
| GO:0016607 | nuclear speck                                | 340  | 183     | 106.3  | 1.72             | 0      | 0   |
| GO:0005815 | microtubule organizing center                | 622  | 329     | 194.4  | 1.69             | 0      | 0   |
| GO:0098794 | postsynapse                                  | 579  | 302     | 181.0  | 1.67             | 0      | 0   |
| GO:0005929 | cilium                                       | 491  | 256     | 153.5  | 1.67             | 0      | 0   |
| GO:0000785 | chromatin                                    | 470  | 245     | 146.9  | 1.67             | 0      | 0   |
| GO:0099568 | cytoplasmic region                           | 440  | 229     | 137.5  | 1.67             | 0      | 0   |
| GO:0097060 | synaptic membrane                            | 410  | 212     | 128.1  | 1.65             | 0      | 0   |
| GO:1990234 | transferase complex                          | 708  | 366     | 221.3  | 1.65             | 0      | 0   |
| GO:0005694 | chromosome                                   | 904  | 466     | 282.5  | 1.65             | 0      | 0   |
| GO:0015630 | microtubule cytoskeleton                     | 1030 | 526     | 321.9  | 1.63             | 0      | 0   |
| GO:0044427 | chromosomal part                             | 796  | 405     | 248.8  | 1.63             | 0      | 0   |
| GO:0097447 | dendritic tree                               | 574  | 285     | 179.4  | 1.59             | 0      | 0   |
| GO:0045202 | synapse                                      | 1108 | 550     | 346.3  | 1.59             | 0      | 0   |
| GO:0000228 | nuclear chromosome                           | 514  | 255     | 160.6  | 1.59             | 0      | 0   |
| GO:0044463 | cell projection part                         | 1299 | 643     | 406.0  | 1.58             | 0      | 0   |
| GO:0120038 | plasma membrane bounded cell projection part | 1299 | 643     | 406.0  | 1.58             | 0      | 0   |

|            |                                         |      |     |       |      |       |       |
|------------|-----------------------------------------|------|-----|-------|------|-------|-------|
| GO:0030054 | cell junction                           | 1196 | 592 | 373.8 | 1.58 | 0     | 0     |
| GO:0044454 | nuclear chromosome part                 | 481  | 238 | 150.3 | 1.58 | 0     | 0     |
| GO:0030425 | dendrite                                | 572  | 283 | 178.8 | 1.58 | 0     | 0     |
| GO:0005912 | adherens junction                       | 514  | 253 | 160.6 | 1.57 | 0     | 0     |
| GO:0070161 | anchoring junction                      | 529  | 260 | 165.3 | 1.57 | 0     | 0     |
| GO:0042995 | cell projection                         | 1948 | 957 | 608.8 | 1.57 | 0     | 0     |
| GO:0120025 | plasma membrane bounded cell projection | 1880 | 921 | 587.6 | 1.57 | 0     | 0     |
| GO:0044456 | synapse part                            | 885  | 432 | 276.6 | 1.56 | 0     | 0     |
| GO:0030424 | axon                                    | 566  | 276 | 176.9 | 1.56 | 0     | 0     |
| GO:0098590 | plasma membrane region                  | 1114 | 542 | 348.2 | 1.56 | 0     | 0     |
| GO:0005856 | cytoskeleton                            | 1892 | 913 | 591.3 | 1.54 | 0     | 0     |
| GO:0005794 | Golgi apparatus                         | 1394 | 663 | 435.7 | 1.52 | 0     | 0     |
| GO:0043005 | neuron projection                       | 1217 | 577 | 380.4 | 1.52 | 0     | 0     |
| GO:0097458 | neuron part                             | 1604 | 758 | 501.3 | 1.51 | 0     | 0     |
| GO:0098791 | Golgi subcompartment                    | 766  | 361 | 239.4 | 1.51 | 0     | 0     |
| GO:0036477 | somatodendritic compartment             | 781  | 367 | 244.1 | 1.50 | 0     | 0     |
| GO:0000139 | Golgi membrane                          | 677  | 318 | 211.6 | 1.50 | 0     | 0     |
| GO:0005887 | integral component of plasma membrane   | 1500 | 703 | 468.8 | 1.50 | 0     | 0     |
| GO:0031226 | intrinsic component of plasma membrane  | 1572 | 732 | 491.3 | 1.49 | 0     | 0     |
| GO:0044430 | cytoskeletal part                       | 1421 | 660 | 444.1 | 1.49 | 0     | 0     |
| GO:0044431 | Golgi apparatus part                    | 868  | 402 | 271.3 | 1.48 | 0     | 0     |
| GO:0005768 | endosome                                | 802  | 366 | 250.7 | 1.46 | 0     | 0     |
| GO:1902494 | catalytic complex                       | 1248 | 558 | 390.1 | 1.43 | 0     | 0     |
| GO:0099081 | supramolecular polymer                  | 831  | 368 | 259.7 | 1.42 | 3E-16 | 1E-14 |
| GO:0098588 | bounding membrane of organelle          | 1878 | 810 | 587.0 | 1.38 | 0     | 0     |
| GO:0098805 | whole membrane                          | 1526 | 646 | 476.9 | 1.35 | 0     | 0     |
| GO:0031984 | organelle subcompartment                | 1514 | 634 | 473.2 | 1.34 | 0     | 0     |
