# Supplementary material for: DYRK1A reinforces epithelial-mesenchymal transition and metastasis of hepatocellular carcinoma via cooperatively activating STAT3 and SMAD
Source: PubMed Central journal article supplement (PMC9164892; doi:10.1186/s12929-022-00817-y), 2022-06-02
Supplement: 12929_2022_817_MOESM8_ESM.pdf [file 12929_2022_817_MOESM8_ESM.pdf]

Supplementary Table 3: GSEA between low- and high- DYRK1A expression HCC samples using LinkedOmics by enriching on WikiPathway

| geneSet | description                                                           | enrichment<br>Score | normalized<br>Enrichmen<br>tScore | pValue   | FDR      | size | leading<br>Edge<br>Num |
|---------|-----------------------------------------------------------------------|---------------------|-----------------------------------|----------|----------|------|------------------------|
| WP366   | TGF-beta Signaling                                                    | 0.6533513           | 1.8188485                         | 0        | 0.003997 | 132  | 50                     |
| WP2857  | Mesodermal Commitment Pathway                                         | 0.640528            | 1.7838839                         | 0        | 0.005996 | 144  | 64                     |
| WP4331  | Neovascularisation                                                    | 0.7410834           | 1.7614212                         | 0.002558 | 0.009327 | 37   | 23                     |
| WP3651  | Pathways Affected in Adenoid Cystic Carcinoma                         | 0.6871385           | 1.7415463                         | 0        | 0.009993 | 60   | 20                     |
| WP3584  | MECP2 and Associated Rett Syndrome                                    | 0.6639486           | 1.7121361                         | 0        | 0.016389 | 68   | 27                     |
| WP3657  | Hematopoietic Stem Cell Gene Regulation by GABP alpha/beta Complex    | 0.8103555           | 1.7110509                         | 0        | 0.014324 | 20   | 9                      |
| WP2038  | Regulation of Microtubule Cytoskeleton                                | 0.6850123           | 1.6896294                         | 0.002433 | 0.021986 | 46   | 22                     |
| WP4533  | Transcription co-factors SKI and SKIL protein partners                | 0.8198331           | 1.6829121                         | 0        | 0.022235 | 18   | 7                      |
| WP364   | IL-6 signaling pathway                                                | 0.6897165           | 1.682824                          | 0        | 0.019765 | 43   | 14                     |
| WP437   | EGF/EGFR Signaling                                                    | 0.6040596           | 1.6686122                         | 0        | 0.021786 | 161  | 68                     |
| WP2261  | Signaling Pathways in Glioblastoma                                    | 0.6268575           | 1.6628105                         | 0        | 0.021804 | 82   | 36                     |
| WP710   | DNA Damage Response (only ATM dependent)                              | 0.6143269           | 1.6621262                         | 0        | 0.019987 | 110  | 39                     |
| WP363   | Wnt Signaling Pathway (Netpath)                                       | 0.6668647           | 1.654693                          | 0        | 0.021986 | 51   | 23                     |
| WP4337  | ncRNAs involved in STAT3 signaling in hepatocellular carcinoma        | 0.8274906           | 1.6474063                         | 0        | 0.023984 | 14   | 6                      |
| WP2853  | Endoderm Differentiation                                              | 0.5953693           | 1.6412635                         | 0        | 0.025317 | 139  | 56                     |
| WP3298  | Melatonin metabolism and effects                                      | 0.6869549           | 1.6407981                         | 0        | 0.023984 | 36   | 11                     |
| WP4016  | DNA IR-damage and cellular response via ATR                           | 0.6241997           | 1.636676                          | 0.002299 | 0.024572 | 77   | 25                     |
| WP3680  | Association Between Physico-Chemical Features and Toxicity Associated | 0.6409993           | 1.6300439                         | 0        | 0.027204 | 65   | 21                     |
| WP313   | Signaling of Hepatocyte Growth Factor Receptor                        | 0.702724            | 1.6290907                         | 0.002571 | 0.026299 | 34   | 13                     |
| WP1539  | Angiogenesis                                                          | 0.7284788           | 1.6284453                         | 0        | 0.025383 | 24   | 14                     |
| WP2324  | AGE/RAGE pathway                                                      | 0.6245354           | 1.6276518                         | 0        | 0.02465  | 66   | 27                     |
| WP51    | Regulation of Actin Cytoskeleton                                      | 0.5781763           | 1.6259658                         | 0        | 0.024348 | 144  | 37                     |
| WP4540  | Pathways Regulating Hippo Signaling                                   | 0.6015148           | 1.6249045                         | 0        | 0.023463 | 98   | 40                     |
| WP1541  | Energy Metabolism                                                     | 0.65798             | 1.6236196                         | 0        | 0.023318 | 47   | 12                     |
| WP2446  | Retinoblastoma Gene in Cancer                                         | 0.6153319           | 1.6193992                         | 0        | 0.024784 | 86   | 31                     |
| WP4655  | Cytosolic DNA-sensing pathway                                         | -0.489778           | -1.571137                         | 0        | 0.095313 | 65   | 17                     |
| WP3963  | Mevalonate pathway                                                    | -0.837901           | -1.585452                         | 0.041916 | 0.087093 | 7    | 5                      |
| WP134   | Pentose Phosphate Metabolism                                          | -0.830309           | -1.586067                         | 0.023952 | 0.090532 | 7    | 5                      |
| WP545   | Complement Activation                                                 | -0.631033           | -1.588629                         | 0.020408 | 0.092096 | 21   | 13                     |
| WP357   | Fatty Acid Biosynthesis                                               | -0.628343           | -1.597326                         | 0.021898 | 0.087988 | 22   | 10                     |

|        |                                                                    |           |           |          |          |     |    |
|--------|--------------------------------------------------------------------|-----------|-----------|----------|----------|-----|----|
| WP4224 | Purine metabolism and related disorders                            | -0.619534 | -1.608489 | 0.012987 | 0.083169 | 22  | 5  |
| WP2359 | Parkin-Ubiquitin Proteasomal System                                | -0.520236 | -1.634646 | 0        | 0.065396 | 67  | 19 |
| WP4290 | Metabolic reprogramming in colon cancer                            | -0.605586 | -1.690905 | 0        | 0.037298 | 40  | 14 |
| WP4718 | Cholesterol metabolism (includes both Bloch and Kandutsch-Russell) | -0.572965 | -1.703154 | 0        | 0.033598 | 44  | 15 |
| WP4752 | Base Excision Repair                                               | -0.623264 | -1.71359  | 0        | 0.030437 | 31  | 12 |
| WP4792 | Purine metabolism                                                  | -0.80468  | -1.72358  | 0        | 0.029527 | 13  | 5  |
| WP197  | Cholesterol Biosynthesis Pathway                                   | -0.7919   | -1.742016 | 0.006211 | 0.026053 | 13  | 6  |
| WP4313 | Ferroptosis                                                        | -0.609871 | -1.746297 | 0        | 0.026361 | 40  | 7  |
| WP15   | Selenium Micronutrient Network                                     | -0.552895 | -1.749062 | 0        | 0.027055 | 74  | 29 |
| WP107  | Translation Factors                                                | -0.603975 | -1.805682 | 0        | 0.012753 | 50  | 21 |
| WP4521 | Glycosylation and related congenital defects                       | -0.687513 | -1.808643 | 0.008065 | 0.013427 | 25  | 7  |
| WP4022 | Pyrimidine metabolism                                              | -0.577003 | -1.827483 | 0        | 0.011356 | 83  | 28 |
| WP1946 | Cori Cycle                                                         | -0.812488 | -1.949934 | 0        | 0.001754 | 17  | 7  |
| WP100  | Glutathione metabolism                                             | -0.771747 | -1.96583  | 0        | 0.001431 | 21  | 7  |
| WP4396 | Nonalcoholic fatty liver disease                                   | -0.620388 | -2.164443 | 0        | 0        | 148 | 57 |
| WP183  | Proteasome Degradation                                             | -0.787261 | -2.367398 | 0        | 0        | 62  | 36 |
| WP623  | Oxidative phosphorylation Mitochondrial complex I                  | -0.885722 | -2.437942 | 0        | 0        | 37  | 29 |
| WP4324 | assembly model OXPHOS system                                       | -0.887087 | -2.649891 | 0        | 0        | 44  | 35 |
| WP111  | Electron Transport Chain (OXPHOS system in mitochondria)           | -0.869946 | -2.798443 | 0        | 0        | 73  | 48 |
| WP477  | Cytoplasmic Ribosomal Proteins                                     | -0.884494 | -2.806662 | 0        | 0        | 88  | 73 |

---
