# Supplementary material for: DYRK1A reinforces epithelial-mesenchymal transition and metastasis of hepatocellular carcinoma via cooperatively activating STAT3 and SMAD
Source: PubMed Central journal article supplement (PMC9164892; doi:10.1186/s12929-022-00817-y), 2022-06-02
Supplement: 12929_2022_817_MOESM9_ESM.pdf [file 12929_2022_817_MOESM9_ESM.pdf]

Supplementary Table 4: GSEA between low- and high- DYRK1A expression HCC samples using LinkedOmics by enriching on PantherPathway

| geneSet | description                                      | enrichment<br>Score | normalized<br>Enrichment<br>Score | pValue   | FDR         | size | leading<br>Edge<br>Num |
|---------|--------------------------------------------------|---------------------|-----------------------------------|----------|-------------|------|------------------------|
| P00047  | PDGF signaling pathway                           | 0.6660469           | 1.8071147                         | 0        | 3.16228E-16 | 123  | 52                     |
| P00018  | EGF receptor signaling pathway                   | 0.6206637           | 1.6877549                         | 0        | 0.016623498 | 114  | 44                     |
| P00033  | Insulin/IGF pathway-protein kinase B signaling   | 0.7059087           | 1.6790763                         | 0        | 0.011698017 | 35   | 18                     |
| P00035  | Interferon-gamma signaling pathway               | 0.7329686           | 1.6511049                         | 0        | 0.019855845 | 27   | 13                     |
| P00057  | Wnt signaling pathway                            | 0.5703342           | 1.6369135                         | 0        | 0.020317609 | 289  | 114                    |
| P00036  | Interleukin signaling                            | 0.6137191           | 1.6252277                         | 0        | 0.021241136 | 77   | 27                     |
| P00059  | p53 pathway                                      | 0.6277772           | 1.6241646                         | 0        | 0.018998283 | 75   | 25                     |
| P00019  | Endothelin signaling                             | 0.6223175           | 1.6195016                         | 0        | 0.018239671 | 75   | 36                     |
| P00005  | Angiogenesis                                     | 0.5713996           | 1.6009708                         | 0        | 0.020317609 | 156  | 57                     |
| P00006  | Apoptosis signaling                              | 0.5782324           | 1.5708006                         | 0.002247 | 0.028259946 | 108  | 38                     |
| P04398  | p53 pathway feedback loops 2                     | 0.6343703           | 1.5604291                         | 0.0075   | 0.031064112 | 46   | 20                     |
| P00021  | FGF signaling pathway                            | 0.5686484           | 1.5489971                         | 0.004484 | 0.035863658 | 102  | 34                     |
| P00009  | Axon guidance mediated by netrin                 | 0.6806663           | 1.5395838                         | 0.007812 | 0.038504    | 30   | 13                     |
| P00015  | Circadian clock system                           | 0.8338329           | 1.5341278                         | 0.014925 | 0.039843622 | 9    | 5                      |
| P00045  | Notch signaling pathway                          | 0.6535572           | 1.5327303                         | 0.002545 | 0.037803066 | 39   | 18                     |
| P00048  | PI3 kinase pathway                               | 0.6225691           | 1.5303725                         | 0.010152 | 0.036710225 | 47   | 22                     |
| P00012  | Cadherin signaling                               | 0.5532303           | 1.5249667                         | 0.00216  | 0.037049757 | 152  | 63                     |
| P00052  | TGF-beta signaling                               | 0.5584162           | 1.4910284                         | 0.007246 | 0.056129959 | 90   | 34                     |
| P00025  | Hedgehog signaling                               | 0.7058694           | 1.4633454                         | 0.027397 | 0.077770751 | 19   | 13                     |
| P04393  | Ras Pathway                                      | 0.5667473           | 1.4581695                         | 0.012346 | 0.07877691  | 69   | 26                     |
| P00053  | T cell activation                                | 0.5583836           | 1.4541644                         | 0.00995  | 0.078455874 | 75   | 20                     |
| P00038  | JAK/STAT signaling                               | 0.7210919           | 1.4525526                         | 0.04507  | 0.076652796 | 15   | 7                      |
| P00034  | Integrin signalling                              | 0.516717            | 1.4463499                         | 0        | 0.078861232 | 166  | 68                     |
| P00003  | Alzheimer disease-amyloid secretase pathway      | 0.5670847           | 1.4449035                         | 0.004796 | 0.077268481 | 63   | 27                     |
| P06959  | CCKR signaling map                               | 0.5104554           | 1.4245817                         | 0.00655  | 0.096637935 | 167  | 50                     |
| P02730  | Asparagine and aspartate biosynthesis            | -0.5466             | -0.914395                         | 0.551351 | 0.936019625 | 4    | 3                      |
| P02755  | Methylmalonyl pathway                            | -0.597724           | -0.926547                         | 0.57971  | 0.940369858 | 3    | 2                      |
| P00051  | TCA cycle                                        | -0.438272           | -0.953292                         | 0.465409 | 0.905421519 | 10   | 2                      |
| P02772  | Pyruvate metabolism                              | -0.50487            | -1.008843                         | 0.445055 | 0.783220302 | 9    | 4                      |
| P02774  | Salvage pyrimidine deoxyribonucleotide synthesis | -0.685747           | -1.067528                         | 0.456522 | 0.664800604 | 3    | 2                      |
| P02727  | Androgen/estrogen/progesterone metabolism        | -0.55175            | -1.075181                         | 0.348837 | 0.678538181 | 9    | 4                      |
| P02722  | Acetate utilization                              | -0.686355           | -1.084761                         | 0.438503 | 0.686620628 | 3    | 1                      |
| P00024  | Glycolysis                                       | -0.553013           | -1.242446                         | 0.143791 | 0.377374513 | 16   | 5                      |
| P02785  | Valine biosynthesis                              | -0.786509           | -1.244469                         | 0.268421 | 0.395532549 | 3    | 2                      |
| P02748  | Isoleucine biosynthesis                          | -0.786509           | -1.244469                         | 0.268421 | 0.395532549 | 3    | 2                      |
| P02776  | Serine glycine biosynthesis                      | -0.744307           | -1.263015                         | 0.191257 | 0.409347088 | 5    | 1                      |
| P00049  | Parkinson disease                                | -0.404049           | -1.30018                          | 0.028571 | 0.364291106 | 84   | 17                     |
| P02787  | Vitamin B6 metabolism                            | -0.840744           | -1.32126                          | 0.131148 | 0.348911813 | 3    | 1                      |
| P02746  | Heme biosynthesis                                | -0.624253           | -1.349551                         | 0.100629 | 0.31993018  | 12   | 6                      |
| P00058  | mRNA splicing                                    | -0.80834            | -1.428764                         | 0.101695 | 0.204502568 | 5    | 2                      |
| P02723  | Adenine and hypoxanthine metabolism              | -0.756747           | -1.434715                         | 0.131148 | 0.215385583 | 6    | 1                      |
| P02744  | Fructose galactose metabolism                    | -0.706411           | -1.479436                         | 0.051724 | 0.161634587 | 11   | 4                      |
| P02752  | Mannose metabolism                               | -0.847521           | -1.496762                         | 0.030864 | 0.150868034 | 6    | 5                      |
| P00013  | Cell cycle                                       | -0.715785           | -1.618858                         | 0.012739 | 0.05011412  | 16   | 5                      |
| P02775  | Salvage pyrimidine ribonucleotide synthesis      | -0.773915           | -1.650449                         | 0.006849 | 0.044156498 | 12   | 7                      |
| P02762  | Pentose phosphate pathway                        | -0.868718           | -1.651395                         | 0.00578  | 0.052006542 | 8    | 4                      |
| P00014  | Cholesterol biosynthesis                         | -0.829726           | -1.760886                         | 0        | 0.017785256 | 12   | 5                      |

|        |                            |           |           |          |             |    |    |
|--------|----------------------------|-----------|-----------|----------|-------------|----|----|
| P02739 | De novo pyrimidine deoxyr  | -0.796932 | -1.769439 | 0.007353 | 0.022895962 | 13 | 6  |
| P02738 | De novo purine biosynthesi | -0.659192 | -1.784905 | 0        | 0.029437665 | 26 | 12 |
| P02740 | De novo pyrimidine ribonu  | -0.844143 | -1.791651 | 0.01227  | 0.056422191 | 10 | 6  |

---
