# Supplementary material for: DYRK1A reinforces epithelial-mesenchymal transition and metastasis of hepatocellular carcinoma via cooperatively activating STAT3 and SMAD
Source: PubMed Central journal article supplement (PMC9164892; doi:10.1186/s12929-022-00817-y), 2022-06-02
Supplement: 12929_2022_817_MOESM10_ESM.pdf [file 12929_2022_817_MOESM10_ESM.pdf]

**Supplementary Table 5: The gene lists of DYRK1A interacting and co-expressed proteins and SMAD2/3 positively co-expressed proteins.**

| DYRK1A<br>interacting<br>proteins | DYRK1A<br>coexpressed<br>proteins | SMAD3<br>coexpressed<br>proteins | SMAD2<br>coexpressed<br>proteins | 25<br>overlapping<br>proteins |
|-----------------------------------|-----------------------------------|----------------------------------|----------------------------------|-------------------------------|
| From Literature                   | From UALCAN                       |                                  |                                  |                               |
| AARSD1                            | SON                               | SIN3A                            | C18orf25                         | AFF1                          |
| ABCF2                             | GABPA                             | RNF111                           | MFN1                             | CAMSAP1                       |
| AFF1                              | SYNJ1                             | SP1                              | RNF4                             | GBF1                          |
| AKR1A1                            | RNF160                            | ACVR1                            | TRIP12                           | NOTCH2                        |
| ALDH9A1                           | EPC2                              | YTHDC1                           | SMARCA5                          | SUPT7L                        |
| ANAPC1                            | BOD1L                             | BPTF                             | ROCK1                            | ANAPC1                        |
| ANAPC16                           | CTDSPL2                           | RYK                              | PIK3C3                           | CDC27                         |
| ANAPC2                            | DPP8                              | ARIH1                            | NARS                             | HAUS2                         |
| ANAPC4                            | SP3                               | SLTM                             | MOBK1B                           | PHF6                          |
| ANAPC5                            | STAG1                             | HMG20A                           | DNAJC13                          | TRIM56                        |
| ANKHD1                            | GPATCH8                           | INO80                            | ATR                              | AP3B1                         |
| AP3B1                             | ZBTB11                            | BOD1L                            | TNPO1                            | DCAF7                         |
| BCAP31                            | YTHDC1                            | TCF12                            | PAFAH1B2                         | HUWE1                         |
| BDP1                              | PIKFYVE                           | TTC30B                           | LUZP6                            | PSMD5                         |
| BICD2                             | REV1                              | KDM3B                            | UEVLD                            | TRIP12                        |
| BRE                               | ROCK1                             | SMARCA1                          | PRPF40A                          | BDP1                          |
| BUB1B                             | ZFP91                             | CLASP1                           | CPSF2                            | EPS15                         |
| C1orf226                          | BIRC6                             | ADNP                             | HUWE1                            | LRBA                          |
| CAMKK2                            | RBM16                             | DNAJC14                          | YWHAG                            | RFX7                          |
| CAMSAP1                           | CREB1                             | TTC30A                           | ZNF397                           | TSC1                          |
| CAMSAP2                           | REST                              | CDK13                            | KIAA1468                         | BICD2                         |
| CAPN2                             | NPAT                              | KIAA1267                         | BAZ1B                            | ERC1                          |
| CAT                               | MGA                               | GPATCH8                          | VPS4B                            | NF1                           |
| CCDC124                           | NARG2                             | ARID2                            | NAA15                            | RNF169                        |
| CCDC97                            | MORC3                             | MATR3                            | DNAJB14                          | WDR47                         |
| CDC23                             | RIF1                              | MAP3K1                           | MBD1                             |                               |
| CDC27                             | SFRS2IP                           | SCAND2                           | NCKAP1                           |                               |
| CFL2                              | CHD8                              | BCL2L1                           | FAM98B                           |                               |
| CNBP                              | AQR                               | ZNF646                           | HNRPLL                           |                               |
| CTTNBP2NL                         | LEMD3                             | GIGYF2                           | ZFP91                            |                               |
| DCAF7                             | ZBTB6                             | VEZF1                            | ATP2C1                           |                               |
| DCPS                              | DCK                               | EPC2                             | USP46                            |                               |
| DDHD2                             | KLHL28                            | SMARCC2                          | EIF4G2                           |                               |
| DNAJC7                            | EP300                             | ZNF142                           | ACTR2                            |                               |
| DPYSL2                            | ARID1B                            | MLLT6                            | TNPO3                            |                               |
| DYRK1A                            | CASP8AP2                          | RNF44                            | KIAA1632                         |                               |
| EAF1                              | EXOC5                             | SRCAP                            | CCDC132                          |                               |
| ELP2                              | SFRS15                            | ZC3H4                            | KPNA4                            |                               |
| EPS15                             | MED13L                            | VPS39                            | C14orf118                        |                               |
| ERC1                              | ZNF236                            | MFAP1                            | TRIM44                           |                               |
| ERCC5                             | HMGXB4                            | ERCC3                            | YLPM1                            |                               |
| EXOSC1                            | RSF1                              | NARG2                            | RAB10                            |                               |
| FAM117B                           | ATAD2B                            | C15orf44                         | PIK3CA                           |                               |
| ABRAXAS1 (FAM                     | SP1                               | WDR73                            | STRN                             |                               |
| FAM53C                            | C18orf25                          | RNF38                            | ACAP2                            |                               |
| FHL2                              | SETX                              | ATF1                             | ARMC8                            |                               |
| FN1                               | CREBBP                            | PTPN9                            | HIAT1                            |                               |
| FZR1                              | ARID2                             | MAML1                            | C10orf18                         |                               |
| GBF1                              | PUM2                              | ZNF236                           | SS18                             |                               |
| GLCCI1                            | RNF169                            | WIPF2                            | RRAGC                            |                               |
| HAUS2                             | INTS2                             | PUM2                             | BOD1L                            |                               |
| HUWE1                             | KIDINS220                         | ZFP161                           | GNL3L                            |                               |

|          |           |          |          |
|----------|-----------|----------|----------|
| KMT2D    | EPC1      | CHD2     | PPP2R5E  |
| KRI1     | ELF2      | RNMT     | KIF2A    |
| LIG1     | ZNF791    | RAB3GAP1 | DHX15    |
| LNPEP    | TSHZ1     | CRAMP1L  | PIAS2    |
| LRBA     | ADNP      | ZBTB44   | RPE      |
| LRRC47   | TRAPPC10  | PUM1     | SAMD8    |
| MED18    | PRPF40A   | CSNK1G1  | ADNP2    |
| MLLT3    | MLL2      | YAP1     | DPY19L1  |
| NF1      | USP25     | CASC3    | POLR2A   |
| NOS1AP   | PRPF4B    | DDX42    | RSPRY1   |
| NOTCH2   | ANKRD12   | GTF3C2   | QSER1    |
| NSUN2    | KIAA1267  | ROD1     | KPNB1    |
| NTMT1    | GIGYF2    | CHST14   | FOXJ3    |
| NUP35    | RALGAPB   | NCOA6    | G3BP2    |
| PARN     | FAM179B   | C2orf67  | ZNF207   |
| PCYT1A   | VEZF1     | ATXN1L   | WIPF2    |
| PEX19    | C22orf30  | EZH1     | DR1      |
| PHB2     | PHF12     | FNBP1L   | SLC39A6  |
| PHF6     | RNF111    | BBS1     | SEPT7    |
| PLBD2    | RBM12     | CCDC93   | CREB1    |
| PPM1G    | BCLAF1    | ELF2     | AQR      |
| PPP1R2   | ZNF24     | ARPP19   | RQCD1    |
| PPP4R2   | ZNF407    | RTF1     | CAPZA1   |
| PPP6R1   | ZNF510    | PIP4K2B  | FUBP1    |
| PSMD5    | KIAA1012  | RFX1     | GNA13    |
| RAD18    | ZNF136    | CHTF8    | BBX      |
| RALGAPA1 | NCOA6     | ANAPC1   | CAB39    |
| RFX7     | SOCS5     | MLL5     | RBM27    |
| RNF169   | USP16     | CMIP     | TOP1     |
| RRM1     | IREB2     | CIAO1    | HCFC1    |
| RRM2     | ZNF41     | PHF12    | C5orf51  |
| SCRIB    | KIAA1632  | LOC90110 | AAK1     |
| SLC38A10 | SMG1      | HIAT1    | GRSF1    |
| SPATA5   | C14orf106 | RBM12    | GART     |
| SRPK1    | ZBTB26    | BAZ2A    | NAA35    |
| SUPT20H  | PPP1R12A  | WAC      | JAK1     |
| SUPT7L   | ATXN7     | SNRNP200 | MEX3C    |
| TANC1    | YLPM1     | GRINL1A  | KIAA0494 |
| TGM2     | SMAD4     | CSNK1A1  | SPTY2D1  |
| TIMELESS | PIK3CA    | THUMPD1  | RAB3GAP1 |
| TOMM34   | QSER1     | TBC1D9   | RBBP4    |
| TONSL    | NR2C2     | MSL1     | CLTC     |
| TRIM56   | MLL5      | SMURF2   | TAX1BP1  |
| TRIP12   | ZNF148    | ABLIM1   | ARPP19   |
| TRMT61B  | SIN3A     | ZFP64    | CAND1    |
| TROAP    | MSL2      | TRAF3IP1 | APPBP2   |
| TSC1     | ACAP2     | RAB5B    | PPP1R12A |
| TSC2     | HELZ      | TRIP12   | ME2      |
| TTK      | ARID1A    | SPG11    | USP25    |
| VPS29    | ARMC8     | TBC1D8   | RSBN1L   |
| WDR47    | CCNT1     | ZNF740   | SRPK2    |
| WDR62    | GRINL1A   | UBE2Z    | TRRAP    |
| WDR70    | C11orf30  | CD2AP    | ZMYM4    |
| XPO7     | TET2      | HNRNPK   | TRIO     |
|          | CAB39     | PIAS1    | RIF1     |
|          | ZNF654    | MBTD1    | KIAA0226 |
|          | ALMS1     | CSNK2A1  | GPATCH8  |
|          | ZNF776    | ZNF512   | BTBD10   |

|           |           |           |
|-----------|-----------|-----------|
| DCAF12    | DDX6      | EPC2      |
| ZNF718    | USP40     | PPP1CB    |
| UBXN7     | AMMECR1L  | RSF1      |
| ASXL2     | UBTF      | MTF1      |
| RNF168    | ZNF500    | KRR1      |
| HLCS      | REV1      | ZNF24     |
| PRDM10    | DYNC1I2   | ATP6V1A   |
| PHC3      | GPR107    | MAPK1     |
| DDX6      | CCNT2     | SF3A1     |
| MIB1      | MED1      | ZNF407    |
| LOC284441 | SUPT7L    | SSH1      |
| SETD1B    | TET3      | NAF1      |
| RBM25     | RALGAPB   | LRCH3     |
| THRAP3    | G3BP2     | KIAA1012  |
| ZDHHC17   | SETD1A    | AVL9      |
| PIK3C2A   | ADAM10    | RNMT      |
| CGGBP1    | CTCF      | TMEM209   |
| CCNT2     | C11orf57  | ABCE1     |
| CUL5      | ZNF830    | COPB1     |
| RNF38     | PARD6B    | WDR7      |
| SRRM1     | AQR       | CNOT4     |
| PHF2      | MARCH7    | CLOCK     |
| MYST4     | MTMR3     | ZKSCAN5   |
| CENPC1    | SMEK2     | UBE3C     |
| CDK12     | INO80D    | ZMYM6     |
| WDFY1     | ASXL1     | VRK2      |
| SMCHD1    | ZNF407    | HNRNPK    |
| MAPK1     | TP53BP1   | CAP1      |
| LRCH3     | TET2      | GTF3C4    |
| ZFP161    | USP34     | NUP155    |
| SF3B1     | PTPN12    | LOC284441 |
| UBR1      | PDCD7     | HIPK3     |
| SENP1     | JAK1      | DDX23     |
| RAB3GAP1  | LOC647979 | THRAP3    |
| SYNRG     | MYST2     | USP14     |
| NUP54     | USP3      | MKLN1     |
| SLK       | C2CD3     | C18orf55  |
| TTC3      | C15orf17  | HNRNPU    |
| SMARCAD1  | POLI      | CHD4      |
| C12orf51  | RNF41     | ZNF800    |
| RTF1      | VPS33B    | SDAD1     |
| HIPK3     | PRPF40A   | DYNC1H1   |
| ADNP2     | ATG16L1   | ATP7A     |
| LOC144438 | ANKS1A    | VAPA      |
| RBM12B    | SMPD4     | CAPRIN1   |
| UBA6      | LOC144438 | SPTLC2    |
| RANBP2    | FAM168B   | RAD50     |
| GOLGB1    | RBM12B    | TBC1D15   |
| FCHSD2    | HNRPDL    | RAPGEF1   |
| KIAA0430  | SART3     | RBM12     |
| G3BP2     | MAP4K3    | SAP130    |
| ITSN2     | RABGAP1   | FBXW11    |
| STRN      | NCKAP1    | HNRNPUL2  |
| SOCS4     | PRR12     | SLC25A40  |
| PCNP      | NR2C2     | GSPT1     |
| MPHOSPH9  | BMS1      | AGFG1     |
| RQCD1     | LCMT2     | TP53BP1   |
| ZBTB1     | METAP1    | CSNK1A1   |

|           |          |           |
|-----------|----------|-----------|
| NUP160    | STK36    | CBL       |
| RSRC2     | PURB     | FYTTD1    |
| ROD1      | ZNF207   | RNF169    |
| KDM5A     | NPEPPS   | GSTCD     |
| C9orf102  | GATAD2B  | TXLNG     |
| ASH1L     | PHF20    | PAPOLG    |
| HNRNPUL2  | ZNF212   | TGFBRAP1  |
| ANKRD17   | ANKRD40  | ESYT2     |
| USP46     | STARD7   | KBTBD2    |
| ATF2      | MOCS3    | ALMS1     |
| BPTF      | ZBTB6    | RECQL     |
| ZNF192    | CP110    | GNAI3     |
| TOP1      | HMGN4    | IPO7      |
| DIP2A     | CREBBP   | DPP8      |
| CHD2      | CTNND1   | ASXL2     |
| ARHGAP5   | LRRC57   | CDC27     |
| ACTR2     | FANCF    | KIDINS220 |
| SOS2      | PRKCA    | SNAPC3    |
| ZNF641    | HCFC1    | CCNI      |
| MON2      | LUZP6    | C2CD3     |
| PPP2R5E   | TNRC18   | CDK8      |
| MEX3C     | KIAA0753 | IPP       |
| TMF1      | TGFBRAP1 | ACTR3     |
| TRIP12    | CSNK2A1P | UBLCP1    |
| MLL3      | CTDSPL2  | VPS8      |
| RCOR1     | KCTD18   | DDX6      |
| SPTY2D1   | AEBP2    | CDC73     |
| MED13     | MAP4K5   | EPS15     |
| ZC3H4     | IFT140   | SLC30A7   |
| RLF       | ARL6IP6  | C9orf129  |
| ZNF397    | SP2      | SLAIN2    |
| CLOCK     | SYNRG    | CAMSAP1L1 |
| KIAA1468  | NUP54    | BAG5      |
| HAUS2     | TULP3    | NFKB1     |
| BAZ1B     | CXorf23  | CDYL      |
| FBXO11    | NFAT5    | RNF141    |
| ETV3      | KIAA0240 | DYM       |
| ZDHHC20   | WDFY3    | FAF2      |
| ZMYM2     | RASA1    | ZMYND11   |
| RBAK      | TCF20    | DYRK1A    |
| RNF41     | SMARCAD1 | RANBP2    |
| LATS1     | TMEM127  | WHSC1L1   |
| GTF3C4    | ZNF609   | LUC7L2    |
| C9orf80   | MED17    | C1orf58   |
| G2E3      | ZFR      | FAM120A   |
| C14orf118 | ARID4B   | STAM2     |
| BAG5      | SON      | ADAT1     |
| UBE3A     | AP2B1    | SMAD4     |
| DCAF17    | NFKB1    | CUL5      |
| DDX46     | UBE3A    | TAF13     |
| SPIN1     | NPAT     | KPNA6     |
| LUC7L2    | RNF214   | KIAA1267  |
| BDP1      | THRAP3   | NSD1      |
| SKIL      | XRN2     | GIGYF2    |
| TSTD2     | TSN      | ANAPC1    |
| NCKAP1    | NF1      | RCHY1     |
| PATL1     | CLK3     | SWAP70    |
| TET3      | PAN3     | TWF1      |

|          |          |          |
|----------|----------|----------|
| FAM98B   | ZMYM4    | ZNF236   |
| NUPL1    | BCL9L    | SFRS2IP  |
| ZBTB43   | WDR35    | PHF6     |
| SLC30A6  | QSER1    | SLC30A6  |
| FAM168A  | RUNDC1   | KIAA0947 |
| TPR      | FOXJ3    | PHF21A   |
| HIVEP1   | FAM179B  | MIER1    |
| KRR1     | CNOT8    | PTP4A2   |
| CDKN2AIP | BAT2L1   | USP42    |
| SMEK2    | SFRS2IP  | TRIM56   |
| SUZ12    | RPAP1    | ANKRD40  |
| INO80    | PCNP     | MBD2     |
| MATR3    | CWC22    | TRAF6    |
| SSH1     | UNC50    | PCNP     |
| GNAQ     | UPF2     | WDR47    |
| RBM27    | ARMC8    | RGP1     |
| GSTCD    | RAB11A   | ROD1     |
| HCFC1    | DLG1     | ANKRD17  |
| CUL3     | RHOT1    | TRIP11   |
| SMURF2   | KDM5A    | ZNF271   |
| ZNF317   | DMTF1    | ATF2     |
| SFRS13A  | RERE     | SBNO1    |
| TCF12    | AFTPH    | INO80    |
| SENP6    | TUG1     | MATR3    |
| MAP4K5   | BBS10    | ZFP161   |
| DCAF5    | JKAMP    | ZBTB11   |
| FAM126B  | CAB39    | CUL3     |
| ZNF627   | ZNF282   | EIF2AK2  |
| TRUB1    | PARD3    | NCK1     |
| USP28    | WAPAL    | SOCS5    |
| PDS5B    | RNF169   | GEMIN5   |
| VPS13C   | ZSWIM1   | CSNK2A1P |
| UEVLD    | ZNF384   | PTPN12   |
| DNAJC13  | CUL3     | SH3GLB1  |
| SLMAP    | CDON     | YTHDC1   |
| C2CD3    | SEPT10   | YWHAQ    |
| ZNF264   | SF3B1    | UBXN7    |
| HNRNPK   | RABL2A   | PWWP2A   |
| ATP11B   | KHDRBS1  | COPB2    |
| CLASP1   | SMARCE1  | ARFIP1   |
| MBTD1    | SPPL3    | RC3H2    |
| CRAMP1L  | KIAA1632 | TBK1     |
| XRN1     | DHX15    | SYNRG    |
| ATRX     | WDR37    | CCDC93   |
| ARPP19   | RALBP1   | HAUS2    |
| CAND1    | ZNF397   | POLR2B   |
| TRA2B    | NXF1     | CAMSAP1  |
| APPBP2   | CAMSAP1  | BICD1    |
| ZNF616   | EXOC1    | NIPA2    |
| TOPBP1   | FBRS     | FKTN     |
| MFAP3    | RPE      | RASA1    |
| SPEN     | UBN1     | SMARCAD1 |
| RSBN1L   | CTNNA1   | ATRX     |
| ZNF646   | ATRX     | RNF41    |
| FAM193A  | ZSCAN29  | C7orf70  |
| NF1      | TAF1     | AKAP10   |
| GSK3B    | GTF3C4   | PIGN     |
| ZNF304   | ZNF638   | ZFR      |

|           |          |          |
|-----------|----------|----------|
| TRIO      | OTUD4    | MIB1     |
| ZNF765    | PPP1R12A | USP9X    |
| STX17     | ARHGAP12 | DDX46    |
| ATF1      | XYLT2    | UBA6     |
| NSD1      | UBE3B    | FIP1L1   |
| HNRPLL    | SP3      | TAOK1    |
| C10orf119 | MLL2     | TWISTNB  |
| ESCO1     | RBM15B   | SAMD4B   |
| PURB      | NUDT21   | AP3B1    |
| PRKD3     | CDYL     | BMS1     |
| WIPF2     | SPTLC1   | EYA3     |
| CAPRIN1   | RGPD4    | MLL5     |
| DENND4C   | YLPM1    | ADAM17   |
| GNA11     | DYRK1A   | CASP8    |
| TRAF6     | KDM3A    | VEZF1    |
| HAUS3     | SPTBN1   | MAP3K2   |
| KLF3      | ATR      | ANKRD13C |
| SMC1A     | QRICH1   | PSME3    |
| SECISBP2L | NRF1     | KIAA0368 |
| RHOT1     | FAM193A  | BIRC6    |
| ZNF417    | GOLGB1   | RNF111   |
| MYST3     | STAM2    | EXD2     |
| SLC25A40  | HNRNPU   | LSG1     |
| MAPK8     | GOSR1    | SLC4A1AP |
| KBTBD4    | ZFC3H1   | SMEK2    |
| NUP153    | KIAA0649 | PAK2     |
| THUMPD1   | NSD1     | DLG1     |
| PDS5A     | FAM200A  | GTF3C3   |
| EIF4G2    | EDC3     | TAF3     |
| WAPAL     | COPS2    | NUP205   |
| HP1BP3    | MSL2     | TMEM184C |
| PAPOLG    | C22orf30 | ZC3H15   |
| TGFBRAP1  | UBAP2L   | DCK      |
| CEP192    | GGNBP2   | CSDE1    |
| RNMT      | GCC2     | RNASEN   |
| CSNK2A1P  | POLG     | PLDN     |
| MOBK11B   | C19orf55 | KIAA1033 |
| DHX15     | KIAA0831 | LUZP1    |
| RBM26     | SEPT2    | CCAR1    |
| SRCAP     | TPR      | DUSP18   |
| SP2       | MALT1    | HMBOX1   |
| SNAPC3    | PIK3C3   | API5     |
| ZNF440    | EFCAB7   | INTS2    |
| SPOPL     | ZNF766   | C7orf42  |
| NCBP1     | NIPBL    | MYNN     |
| ZNF180    | MBD5     | AEBP2    |
| MAP3K3    | HNRNPUL2 | LARP1    |
| UBN2      | C7orf49  | QTRTD1   |
| VPS4B     | ZNF362   | TMF1     |
| SLTM      | MAPK1    | UTP20    |
| CHD6      | SMNDC1   | PDCD6IP  |
| ZSCAN29   | KIF5B    | UBR1     |
| DNAJC14   | MAPKSP1  | RCOR1    |
| UVRAG     | BTBD7    | RBM45    |
| ZFR       | GSTCD    | IARS     |
| ZNF12     | ATF7     | CCDC55   |
| FRYL      | MTMR12   | PREPL    |
| HMG20A    | SOCS5    | USP28    |

|            |           |          |
|------------|-----------|----------|
| C10orf118  | C7orf42   | RLF      |
| SRRM2      | IREB2     | SENP1    |
| PKNOX1     | TCTN2     | REST     |
| ANKRD36BP1 | RFX7      | KDM3B    |
| TRIM44     | MEX3C     | DENND5A  |
| CDC42BPB   | CNOT6     | STX12    |
| SART3      | ASXL2     | VPS13C   |
| WHSC1L1    | ATXN2     | SNX6     |
| ATR        | ZNF33B    | CLASP1   |
| CDK17      | UBR1      | BTBD1    |
| RBBP6      | ARFIP1    | FUT11    |
| VPRBP      | RSBN1     | TTF2     |
| WDR82      | B4GALT5   | ZCCHC4   |
| TUBGCP4    | KIAA1468  | PHC3     |
| PAN3       | C4orf42   | OTUD4    |
| ZDHHC21    | BAZ1B     | DHX8     |
| HNRNPU     | DDX18     | EIF3A    |
| USP8       | UBN2      | SP3      |
| CPSF2      | CS        | MFAP1    |
| PRR12      | AKAP10    | EXOC5    |
| ZNF37A     | RBMX      | MFAP3    |
| CELF1      | CUEDC1    | NPAT     |
| PPM1D      | ZNF592    | RAB21    |
| GMCL1      | ZNF12     | RBM12B   |
| ADAM10     | DARS      | PDCD10   |
| ZBTB8A     | DCP1A     | CALU     |
| PAFAH1B2   | VPS54     | RAB5C    |
| TNKS2      | BAT2      | RNF214   |
| BRMS1L     | PAXIP1    | SRP72    |
| TBC1D15    | PLEKHA7   | USP32    |
| RGPD3      | TJP1      | ABCF2    |
| PIK3C3     | WHSC2     | NF1      |
| TOPORS     | TRRAP     | GSK3B    |
| C10orf18   | ZMYND11   | ZDHHC21  |
| APPL1      | TNS3      | RPAP2    |
| WAC        | LOC220930 | ARHGEF12 |
| DLG1       | CHMP1B    | RNF145   |
| CP110      | LUC7L2    | PIK3C2A  |
| KIAA0586   | RBBP6     | PUS7L    |
| BBX        | CBX3      | ENTPD4   |
| AASDH      | MAPKBP1   | MED1     |
| CPSF7      | SAMD4B    | MSI2     |
| MRE11A     | MBD1      | YIPF5    |
| PLDN       | FAM40A    | TTC37    |
| TXLNG      | PRPF4B    | CEBPZ    |
| ZNF721     | C3orf17   | SRRM1    |
| CSTF2T     | DHX9      | DNM1L    |
| RNF138     | ZNF319    | GMCL1    |
| HIVEP2     | RELA      | ITSN2    |
| HNRNPF     | TGIF1     | SIN3A    |
| RFX7       | DYNC2LI1  | C22orf30 |
| SMC3       | RABL2B    | GNA11    |
| UBXN4      | UBFD1     | SOCS4    |
| PWWP2A     | RUFY2     | HMGXB4   |
| USP24      | ZNF704    | UBE2H    |
| POLR2B     | VPS41     | MALT1    |
| FKTN       | ARF3      | CDK12    |
| FBXO34     | DBR1      | ZNF267   |

|          |          |          |
|----------|----------|----------|
| FUT11    | SLC39A6  | SCYL2    |
| ZNF609   | CHD8     | GDAP2    |
| ZNF543   | RICTOR   | SP1      |
| AKAP10   | UIMC1    | MARCH6   |
| SAMD8    | CASC4    | ETAA1    |
| PTAR1    | ATXN7L3  | VANGL1   |
| SFRS1    | RSF1     | CKAP5    |
| OTUD4    | WWC2     | PHTF2    |
| C9orf129 | CDK12    | APPL1    |
| CDYL     | DYNC1LI2 | KDM5A    |
| RC3H1    | ZNF397OS | ANKRD52  |
| UHRF2    | C17orf71 | CCDC6    |
| ATF7IP   | LEMD3    | MYST3    |
| GAPVD1   | NUP160   | CCNT1    |
| TRRAP    | SLC4A1AP | KBTBD4   |
| TAOK1    | ETAA1    | MRE11A   |
| ZNF33A   | C18orf25 | YY1      |
| FRS2     | TMEM128  | AGAP1    |
| STRN3    | RSRC2    | SMCR8    |
| TM9SF3   | C10orf18 | MED14    |
| C14orf43 | ASH1L    | ZNF317   |
| DNAJB14  | KIAA1109 | CTDSPL2  |
| C15orf29 | USP46    | DCAF12   |
| RABGAP1  | MARK2    | SFRS13A  |
| SMEK1    | TAF3     | TCF12    |
| PUS7L    | PCBP2    | ZNF641   |
| BMPR2    | MORF4L1  | DYRK2    |
| ZNF800   | GIGYF1   | PLAA     |
| FOXJ3    | RSL24D1  | SF3B1    |
| SR140    | AASDHPPT | ZNF41    |
| NHLRC2   | TAF4     | CNOT6    |
| REV3L    | SSH1     | SNX13    |
| MAP3K2   | ZNFX1    | FAM118B  |
| DR1      | ZNF623   | EIF4H    |
| GGNBP2   | CCAR1    | ZMPSTE24 |
| KIAA0947 | HEATR5B  | YEATS2   |
| GCC2     | TCERG1   | USP24    |
| HEATR5A  | SLC24A1  | PACRGL   |
| ABL1     | GRSF1    | NCBP1    |
| NAB1     | SF1      | SNRNP27  |
| FBXL3    | HNRNPF   | PNPT1    |
| ZNF17    | ERBB3    | SLK      |
| HUWE1    | DPP8     | DDX18    |
| WDR47    | BAHCC1   | HDHD2    |
| PIK3R4   | KLHL9    | ETV3     |
| FAM116A  | ZNF627   | TARDBP   |
| ETAA1    | PWWP2A   | ZMYM2    |
| INO80D   | CCDC55   | HARBI1   |
| ARFGEF2  | PREPL    | UVRAG    |
| KIAA1109 | RBM39    | TTC9C    |
| ALG10B   | MKRN1    | TMEM106B |
| TAF3     | MLL      | YME1L1   |
| ZCCHC11  | YEATS2   | PEX26    |
| AFTPH    | C11orf58 | STIM2    |
| SBNO1    | DCAF16   | DCAF17   |
| SLC30A9  | ZKSCAN5  | ZC3HAV1  |
| GTF2A1   | CAD      | EPRS     |
| KIF5B    | HIF1AN   | ATF7IP   |



|              |          |          |
|--------------|----------|----------|
| YY1          | ZC3H11A  | NSF      |
| PHIP         | FOXP1    | ZFYVE26  |
| CRTC3        | PPWD1    | RBBP5    |
| BTBD7        | DNAJC13  | SART3    |
| HIPK1        | EP300    | THAP1    |
| MSL1         | FBXO11   | FAM193A  |
| CCAR1        | DNAL4    | GOLGB1   |
| ARL13B       | ZNF264   | STAG1    |
| MED14        | ITGA2    | GPR107   |
| LUZP6        | NIPA2    | OSMR     |
| MTMR12       | ARL5A    | C3orf17  |
| API5         | PHC3     | BMPR2    |
| NUFIP2       | CHD6     | ATG4C    |
| MYNN         | ZNF543   | SYNJ1    |
| DYRK2        | DDX52    | SUPT7L   |
| ATM          | LRRC37A  | NR2C2    |
| NAA35        | IWS1     | TMEM185B |
| TRIM33       | SFRS1    | IMPACT   |
| ARIH1        | SETD1B   | RUNDC1   |
| KIAA0494     | TMEM87A  | NECAP1   |
| SNX13        | ADNP2    | ZNF148   |
| RSBN1        | SRRM2    | ADAM10   |
| RC3H2        | C17orf63 | NEDD1    |
| S100PBP      | PDPK1    | NPEPPS   |
| TAF1B        | DDX46    | ARF3     |
| ZNF92        | UBA6     | DBR1     |
| MYST2        | SRPK2    | ZNF562   |
| GAB1         | BFAR     | CHD8     |
| SNX6         | TRIM32   | DDB1     |
| ZNF689       | RANBP2   | SEC23IP  |
| CREBZF       | ZNF33A   | KIAA0232 |
| TAF1         | LMBR1    | SKIV2L2  |
| CDC73        | SNX33    | CCDC75   |
| GTF2H3       | ATXN7L3B | FAM168A  |
| TNRC6B       | ANP32A   | TMOD3    |
| IKZF4        | GSK3B    | NSUN4    |
| NFKB1        | ZDHHC17  | ZFP106   |
| BAT2         | POLR2A   | DYNC1LI2 |
| FEM1B        | MACF1    | C17orf71 |
| PBRM1        | SETD5    | BAZ2A    |
| BCOR         | DCAF7    | RIT1     |
| HSPA13       | PKN2     | TSR1     |
| STK4         | TMEM109  | SETX     |
| ZMYND11      | HNRNPL   | DHX36    |
| HIATL1       | BTN2A1   | RAB35    |
| LOC100271836 | YTHDF1   | YTHDF2   |
| MAPK1IP1L    | TMEM185B | LRRC57   |
| CDK13        | CPSF6    | GRINL1A  |
| STAM2        | PHF2     | PIAS3    |
| MAPKBP1      | ADAM17   | RP2      |
| SLC12A6      | GGA3     | BPTF     |
| PCNX         | KIAA0174 | JKAMP    |
| C3orf17      | CNNM4    | HIPK1    |
| ZNF134       | ZNF337   | DDX5     |
| MDM1         | DENND4C  | NCOA6    |
| GOSR1        | CCDC121  | C4orf41  |
| ZMYM1        | CLUAP1   | CLCN3    |
| MED1         | KIAA1310 | POM121C  |

|           |          |            |
|-----------|----------|------------|
| ERCC6     | RNF4     | BRAF       |
| USP47     | USP42    | KIAA1279   |
| ARHGAP21  | PIGG     | DCLRE1B    |
| ANAPC1    | HMGXB4   | UHRF1BP1   |
| NEDD1     | FAM134A  | MRPL3      |
| HNRNPH3   | CREB1    | KHDRBS1    |
| ZNF292    | DSP      | TRAF3IP1   |
| PTPRA     | ATP2C1   | MLL3       |
| DBR1      | HUWE1    | WBP11      |
| MIER1     | ZNF516   | SP2        |
| USP42     | ARHGEF18 | UBE2Z      |
| SEC23IP   | FBXL19   | GTF2I      |
| ANKRD40   | FXR1     | AKAP11     |
| SEPT7     | WDR47    | RALBP1     |
| PPP1CB    | DZIP3    | C1orf109   |
| UPF2      | ZNHIT6   | ELF2       |
| EEA1      | BCLAF1   | ZNF791     |
| WWC2      | ZNF561   | MYST2      |
| SMARCC2   | SPATA2   | FBXO11     |
| TBC1D12   | HN1L     | EXOC1      |
| TOX4      | NUDCD3   | NDE1       |
| BAZ2A     | LDB1     | FCF1       |
| KIAA1328  | MRE11A   | DHX29      |
| DIS3L     | KIAA0406 | ARL5A      |
| GTF3C3    | PTCH1    | RBAK       |
| TTC21B    | TADA2A   | LPP        |
| ZNF107    | CBL      | YARS2      |
| ZNF561    | ADCY6    | PPP1R8     |
| DMTF1     | NPTN     | RPAP3      |
| GNA13     | SUPT6H   | PSMD1      |
| TRIP11    | DGCR2    | INCENP     |
| CTNND1    | SMCR8    | SFRS1      |
| TMEM184C  | TOP1     | SON        |
| SMNDC1    | ELK4     | AGGF1      |
| TMTC3     | MKL2     | ENOPH1     |
| ZNF443    | KBTBD2   | TOPBP1     |
| SMCR8     | ZNF776   | VPS26A     |
| C4orf41   | NUFIP2   | CYFIP1     |
| KBTBD2    | DCAF12   | MOSPD2     |
| NEK1      | IPO7     | LOC646762  |
| USP37     | QTRTD1   | SNAP23     |
| WDR11     | SUFU     | ANKRD36BP1 |
| C3orf63   | STK38    | TRIM32     |
| SUDS3     | WBP11    | LCORL      |
| KLHL9     | CWC25    | MED13L     |
| PDCL      | PDCL     | XRN2       |
| RBM14     | EXOC7    | RSRC1      |
| LOC647979 | TAF15    | EIF2S1     |
| MEF2A     | PRPF40B  | WDR82      |
| RBBP4     | SEN1     | MTA2       |
| RPRD2     | CNOT4    | BCL9L      |
| CCNI      | GON4L    | ZNF765     |
| PPM1A     | EPC1     | DCAF7      |
| NDE1      | RPRD2    | ZMYM1      |
| FANCM     | COPS7B   | DUSP11     |
| MIER3     | C3orf19  | WDR35      |
| PRKAA1    | VPS13C   | SRFBP1     |
| LRIG2     | TM9SF4   | RLIM       |

|          |              |            |
|----------|--------------|------------|
| PUM1     | ARID1B       | DDX3X      |
| DCP1A    | CNOT2        | TMED4      |
| ZNF484   | FBXO34       | ARHGAP21   |
| EPS15    | NEO1         | RSPH3      |
| BRD2     | PRDM10       | RALGAPB    |
| MPHOSPH8 | TARDBP       | ESCO1      |
| TJP1     | TFCP2        | PURB       |
| RGPD4    | TLK2         | R3HDM1     |
| NAA30    | SDCCAG1      | TAF2       |
| ARID4A   | C12orf51     | NUPL1      |
| RBBP5    | LRIG2        | COPS2      |
| RSRC1    | MED12        | SCRN3      |
| C1orf58  | ITGB1        | RNF6       |
| QRICH1   | FAM107B      | EIF2C4     |
| PARG     | RPL32P3      | CCDC52     |
| GCFC1    | SRC          | HUS1       |
| GK5      | BAG5         | AKIRIN1    |
| POLR2A   | DCAF17       | FAM199X    |
| FAM13B   | RC3H1        | ABL1       |
| ARHGEF12 | MFAP3        | MED21      |
| PKN2     | DHX40        | HMGXB3     |
| CHD4     | MGA          | TPR        |
| USP1     | TGOLN2       | BMP2K      |
| CNOT6L   | DDX23        | ARID1A     |
| PTPN9    | VPS24        | IPO8       |
| RCHY1    | GPBP1L1      | EFCAB7     |
| MAML1    | LOC100271836 | ZNF516     |
| DCLRE1A  | BDP1         | MARCH7     |
| CPSF6    | CCDC103      | ATL3       |
| SIRT1    | USP8         | ZBTB1      |
| RUFY2    | ZNF304       | NUP160     |
| ZBTB34   | LRRC37A2     | FAM116A    |
| ATP7A    | MBTPS1       | WAC        |
| CTCF     | ZNF134       | HNRNPR     |
| EIF2AK3  | SMAD4        | C9orf102   |
| PHF6     | CHD4         | OPA1       |
| ZNF845   | KIAA0430     | LIMS1      |
| RNF6     | KPNB1        | PUM2       |
| CEP350   | SDAD1        | AFTPH      |
| CCDC52   | ABI2         | KIAA1430   |
| SMC6     | MNT          | CSGALNACT2 |
| KIAA0831 | HEATR2       | FAM38B     |
| EXD2     | GMCL1        | EIF4G3     |
| IPO8     | ROCK1        | ARL13B     |
| LASS6    | PTPRA        | ATXN1L     |
| ATP2C1   | C4orf14      | NACC2      |
| MARCH7   | DCTN5        | NAA50      |
| HIAT1    | MUTED        | NEK1       |
| SCYL2    | PHF21A       | YWHAB      |
| SAP130   | ERBB2IP      | HNRNPF     |
| DSCR3    | ZNF146       | ZDHHC5     |
| AP4E1    | ABL1         | PSEN1      |
| NIPBL    | PTPRG        | C18orf10   |
| SLC35A5  | NAB1         | UBXN4      |
| ATP6V1A  | HELZ         | CCNK       |
| ZNF142   | NEK9         | SRCAP      |
| BAZ2B    | RGPD3        | DNAJC21    |
| LRRC57   | JRKL         | BCL10      |

|            |          |           |
|------------|----------|-----------|
| CSGALNACT2 | ARID1A   | C14orf106 |
| CBL        | ZNF280D  | TAF1B     |
| USP34      | KLF3     | FKBP14    |
| FYTTD1     | MAP4     | ZNF410    |
| KIAA0528   | BMPR1A   | ZNF92     |
| RBM7       | WDR5B    | NUP54     |
| ZNF550     | ORC4L    | ARID1B    |
| ZNF567     | SLU7     | ZDHHC20   |
| CWF19L2    | SAP130   | ADNP      |
| AEBP2      | MOBK1A   | TFCP2     |
| SMARCA5    | KIAA0495 | ARL6      |
| NAA50      | KRR1     | SLTM      |
| UHRF1BP1   | G3BP1    | PAFAH1B1  |
| ZNF587     | GTF3C3   | KIAA0196  |
| SPG11      | FUBP1    | DDX52     |
| CDC27      | ANKRD17  | VPS11     |
| WDR7       | ZC3H12C  | C9orf80   |
| AFF1       | BBX      | ZNF12     |
| PTPN11     | BAT2L2   | HIP1      |
| KIAA2026   | MAGI3    | ATG16L1   |
| NXF1       | SMAD7    | DARS      |
| ZNF799     | CSNK1D   | RTF1      |
| CDK8       | PRPF38B  | SLC35E1   |
| CBLL1      | PHIP     | RNF160    |
| CNOT2      | TRIP4    | FKBP15    |
| TARDBP     | CRTC3    | SNX12     |
| TCF20      | NAF1     | DNAL1     |
| DEK        | LRCH3    | NUDT21    |
| ARL5A      | MYO5C    | DHX40     |
| FUBP3      | NFE2L2   | TMEM165   |
| ZCCHC4     | FBXL20   | ETF1      |
| ZNF318     | GPBP1    | BTF3L4    |
| POLA1      | BBS4     | MGA       |
| CCDC82     | ARHGAP5  | CDC42BPB  |
| PIGN       | SPIN3    | LMBR1     |
| ARID4B     | POM121C  | NARG2     |
| ZNF326     | ATXN2L   | LRRC41    |
| ZNF592     | GEMIN5   | PARG      |
| TMEM106B   | GNAI3    | BDP1      |
| INCENP     | LAPTM4A  | PARP4     |
| PAPD4      | TMEM209  | SP4       |
| SPAST      | WDR60    | TUBGCP4   |
| DHX8       | ZDHHC5   | DOCK7     |
| SLAIN2     | NIPA1    | GMEB1     |
| SOCS6      | YWHAQ    | RNF34     |
| USP9X      | KCTD10   | C9orf41   |
| CLDND1     | NFRKB    | PALB2     |
| FIP1L1     | FASTKD2  | PDZD8     |
| TRIM32     | BIRC2    | KIAA0430  |
| USP48      | SMG1     | PATL1     |
| DDX23      | NAA40    | RNF38     |
| THAP6      | ZNF548   | PAPOLA    |
| PCNT       | RBM14    | NHLRC2    |
| SP4        | TRIM52   | FAM179B   |
| LRRC58     | GOLGA2   | CNOT8     |
| SETD5      | LUC7L3   | SOS1      |
| DCAF7      | GTF2I    | LEPROT    |
| BRD1       | WDR48    | CTCF      |

|          |           |          |
|----------|-----------|----------|
| PALB2    | FAM178A   | AAGAB    |
| DENND1B  | C5orf15   | ZNF845   |
| ZBTB5    | USP24     | VPS13B   |
| SUPT7L   | ZBTB26    | LARP7    |
| NOTCH1   | PDS5B     | FPGT     |
| TMEM39A  | C14orf135 | PIGG     |
| EYA3     | RAI1      | PHF12    |
| CNOT8    | LARP4B    | CRLF3    |
| ZNF207   | VPS4B     | EIF3J    |
| LIN54    | TMEM43    | MPHOSPH9 |
| BAT2L1   | TBL1XR1   | AP2A2    |
| PTPRK    | ZCCHC4    | ZBTB38   |
| GATAD2B  | MIER3     | LEMD3    |
| ZNF562   | RFWD3     | ZBTB6    |
| RNF4     | USP21     | MOBK1A   |
| ERBB2IP  | PIGN      | DIP2B    |
| KIAA0368 | GLYR1     | COPS8    |
| IRF2     | NFATC2IP  | DSCR3    |
| STAG2    | GTF2IRD1  | CDC42SE2 |
| RAB14    | PMS2      | ZNHIT6   |
| C17orf71 | APPBP2    | RHOT1    |
| ZNF619   | DPF2      | NIPBL    |
| DIP2B    | ZC3H6     | SLC35A5  |
| PTPN21   | HINFP     | KIAA0586 |
| MARCH6   | XRCC5     | UBE2D3   |
| RGP1     | DNAL1     | ARID2    |
| MTMR3    | RNF20     | ZNF142   |
| DHX36    | CCDC45    | MARK2    |
| KIAA2018 | FAF2      | RNF11    |
| ZFX      | ORC2L     | ANKMY2   |
| BAT2L2   | HIATL1    | KDSR     |
| LDB1     | NUMA1     | GTF2A1   |
| TUG1     | CCDC97    | WDR43    |
| BBS10    | TEAD1     | KIF5B    |
| KIAA0406 | PARG      | GNAQ     |
| SCARB2   | WDR82     | TET2     |
| C5orf51  | TUBGCP4   | THUMPD1  |
| MKL2     | TM9SF3    | PDS5A    |
| POLH     | BICD2     | BTBD7    |
| AAK1     | USP10     | GIT2     |
| RYK      | RIF1      | ZNF623   |
| RECQL    | BRD1      | COPS4    |
| ZNF175   | LATS2     | MTMR6    |
| ZDHHHC5  | CUL5      | NUB1     |
| IPO7     | RASAL2    | XPO6     |
| COPB1    | RLIM      | TRAK2    |
| TRAF3IP1 | FAM98B    | TCERG1   |
| KBTBD7   | RIC8A     | RHBDD1   |
| ARF6     | DOCK1     | NUFIP2   |
| LIN52    | ARHGAP32  | AP1G1    |
| VEZT     | SR140     | UBA3     |
| CWC25    | PTPRF     | LRPPRC   |
| SHOC2    | HNRNPA1L2 | HIVEP2   |
| PPP6C    | PKD2      | PPAT     |
| GTF2I    | TBC1D22B  | TMEM48   |
| AKAP11   | ILF3      | E2F3     |
| ZNF836   | CAPRIN1   | TLN1     |
| SUN1     | JARID2    | SPG11    |

|          |           |              |
|----------|-----------|--------------|
| ZW10     | PIGS      | SSRP1        |
| VPS39    | TNKS2     | PRKDC        |
| CCDC93   | MBD2      | PDCL         |
| KDM3B    | BIRC6     | C1orf83      |
| CAMSAP1  | SKIV2L2   | S100BPB      |
| ANKRD26  | MINK1     | CFLAR        |
| ELF1     | GRB7      | MKRN1        |
| NIPA2    | TTC5      | KDELC2       |
| KIAA0240 | ANKRD11   | AFG3L2       |
| UBN1     | WDFY1     | ZW10         |
| TFCP2    | MBNL1     | RNF168       |
| MADD     | FBXW11    | EPC1         |
| SDCCAG1  | TBCK      | PLEKHA8      |
| ZBTB44   | CDC42SE2  | SLMAP        |
| ZNF420   | MORC2     | CBLL1        |
| ATG2B    | C20orf4   | ATP11B       |
| YME1L1   | ZNF24     | WDFY3        |
| CBX1     | CCDC6     | THUMPD3      |
| KPNA4    | CCNDBP1   | BLZF1        |
| BRPF1    | ZBTB4     | MCPH1        |
| PPP3R1   | HNRNPD    | TMEM127      |
| AMMECR1L | U2AF2     | PLEKHA3      |
| UBTF     | SEC11A    | DNAJC14      |
| MOSPD2   | SMG7      | RFWD3        |
| PAXIP1   | N4BP1     | MED17        |
| TULP4    | CSDE1     | IWS1         |
| FAF2     | ZNF234    | PUM1         |
| SPATA13  | RNASEN    | PIKFYVE      |
| ZZZ3     | ABI1      | SPAST        |
| UBR7     | RBM27     | HNRNPA2B1    |
| FAM73A   | ROCK2     | MLL2         |
| SGK269   | ZBTB11    | UBTF         |
| HERC3    | BCL7A     | NOL10        |
| SAMD4B   | CSRP2BP   | SEC23B       |
| RFX1     | C16orf63  | CCDC50       |
| SACM1L   | CEP290    | LOC144438    |
| SFRS12   | PAPOLG    | RNF20        |
| MAP2K1   | EIF4ENIF1 | SPRED1       |
| RBM43    | INTS2     | MPHOSPH8     |
| SENP7    | NCK1      | USP48        |
| SPAG9    | CWF19L2   | HIATL1       |
| LCMT2    | UBA3      | ZZZ3         |
| YES1     | ADO       | FAM73A       |
| DOCK1    | ZBTB7A    | GMFB         |
| PTTG1IP  | YWHAB     | LOC100271836 |
| VKORC1L1 | MLH3      | CTDP1        |
| SETD1A   | CASP2     | C14orf43     |
| DNM1L    | FGD6      | CBX3         |
| ZNF197   | UBXN7     | MAPKBP1      |
| FBXW2    | CEP68     | GNB1         |
| ANKRD13C | KIDINS220 | FAM102B      |
| ZEB1     | ZNF507    | TRIM37       |
| RICTOR   | ZNF143    | CCNT2        |
| NPHP3    | KDM1B     | GOSR1        |
| C11orf57 | INADL     | GPN1         |
| CCDC75   | SGPL1     | HIF1A        |
| BRD3     | TRIM13    | SELT         |
| MALT1    | SNRNP27   | ANKRD12      |

|          |           |          |
|----------|-----------|----------|
| ZNF397OS | POLR2B    | ZNF37A   |
| RAPGEF1  | MEX3D     | GTF3C1   |
| IPMK     | MAST4     | MFHAS1   |
| PELI1    | STAU1     | HNRNPL   |
| SMU1     | ZMYM2     | USP1     |
| CKAP5    | TNPO2     | USP47    |
| SGPP1    | C5orf41   | KIAA0317 |
| HNRNPR   | PGBD4     | ATF1     |
| OPA1     | ZNF248    | AHCYL1   |
| SF3A1    | CHMP5     | RIC8A    |
| AGFG1    | ZNF260    | PTPN9    |
| CAMK2D   | RAD51L3   | YES1     |
| PIIG     | WWTR1     | TFAM     |
| FOXJ2    | ACVR2A    | GTF2H1   |
| TAF4     | ZNF805    | MAML1    |
| ALG10    | PAPD4     | CPSF6    |
| ZNF557   | HNRNPA2B1 | KCMF1    |
| GIT2     | DHX8      | MYST4    |
| LUZP1    | CAMSAP1L1 | MYH9     |
| MYO5C    | RNPS1     | PRKD3    |
| NCK1     | RBM25     | VPS41    |
| POM121C  | KDM5C     | ZNF639   |
| PTPN12   | CYFIP1    | M6PR     |
| ZBTB2    | USP25     | RALA     |
| MOBK13   | EIF4B     | GBF1     |
| GART     | BTF3L4    | CUL2     |
| MTX3     | GAPVD1    | FKBP9    |
| YWHAB    | SLC11A2   | GATAD2B  |
| ZNF354B  | SNAP23    | GCC2     |
| KHDRBS1  | CDC42BPB  | RICTOR   |
| PSEN1    | ZZZ3      | UIMC1    |
| METTL14  | LRRC41    | ZFYVE9   |
| PRMT10   | CCDC43    | USP15    |
| ZNF143   | GPATCH2   | CEP63    |
| WDR37    | TRIM4     | KLF3     |
| RBM39    | PKP4      | HIVEP1   |
| KDELC2   | ZMYM1     | SMARCC2  |
| CNOT4    | FBXO21    | ZNF434   |
| BTRC     | BMPR2     | MINK1    |
| CD2AP    | PALB2     | EFTUD2   |
| ANUBL1   | PIK3CA    | LASS6    |
| GOPC     | SFRS12    | ZNF397OS |
| CLTC     | RBM43     | RAB23    |
| NUP98    | CEP170    | MTMR9    |
| RMI1     | LOC550112 | UTP3     |
| DOCK9    | HNRPLL    | WRN      |
| ANKRD50  | NR2F2     | TMX1     |
| ZC3H11A  | SRRM1     | KCTD7    |
| ALKBH8   | TFAP4     | STXBP3   |
| SNRNP27  | TRA2A     | POLK     |
| EXOC1    | RDH14     | PAIP1    |
| TMX3     | AP1AR     | BCLAF1   |
| ZFYVE16  | ZBTB34    | FAM114A2 |
| SPRED2   | ZNF148    | CREBBP   |
| C5orf41  | LSM14A    | ZBTB4    |
| TUBGCP3  | LEPROT    | MAPK8    |
| MED17    | DIS3L2    | ACVR1    |
| NUP155   | PTPRK     | USO1     |

|          |              |           |
|----------|--------------|-----------|
| SERTAD2  | ZFP91        | GCN1L1    |
| NAA15    | MED28        | SMNDC1    |
| HECTD1   | JMJD1C       | NOM1      |
| UBE3B    | AAGAB        | C10orf46  |
| EIF3A    | KIAA0947     | SPATS2    |
| DCAF10   | DDB1         | C11orf30  |
| BAG4     | STK25        | LOC441208 |
| XRCC5    | CTDSP2       | PIP4K2C   |
| TIA1     | SAFB2        | CYLD      |
| ZNF500   | UBE2H        | SUPT6H    |
| ZNF441   | RAD50        | ETV6      |
| RAB21    | HCG18        | MTMR12    |
| FAM168B  | TMOD3        | KLHL28    |
| UBE4A    | EXD2         | MAN1A2    |
| HNRPDL   | MTF1         | WDR3      |
| CYP20A1  | PYGO2        | LARS      |
| ZFYVE26  | PPP1R2       | CSTF2T    |
| ZNF708   | DIP2B        | MOBKL3    |
| BACH1    | TOX4         | ZBTB7A    |
| ORC2L    | PUS7         | MAP4K5    |
| WHSC1    | NCBP2        | MTX3      |
| SRP72    | PATZ1        | CHCHD3    |
| GMFB     | SMU1         | ARAP2     |
| MYSM1    | CDKN2AIP     | RNF44     |
| TNPO1    | ZFHX3        | MMGT1     |
| ZMYM4    | CRKL         | TRIM33    |
| MBD1     | DHX36        | VTI1A     |
| BCL9L    | STXBP3       | TTC30B    |
| ZFC3H1   | LRBA         | VEZT      |
| MYCBP2   | LOC100129550 | NAA40     |
| BAZ1A    | INTS12       | ZNF664    |
| KPNB1    | ALG10B       | RBM14     |
| TMED4    | SF3A1        | DNM2      |
| SDAD1    | BRD7         | PPP6C     |
| FAM111A  | ATF2         | ZC3H4     |
| ALS2CR8  | C9orf82      | MRPL42    |
| APC      | AGFG1        | PTPN11    |
| RASSF3   | ZC3H7A       | PCYT1A    |
| ZNF639   | NUP153       | STARD3NL  |
| COPS2    | COIL         | CD2AP     |
| MED23    | RAB11FIP2    | ZBTB26    |
| SPTLC2   | PRDM4        | PDS5B     |
| GBF1     | YY1          | LMTK2     |
| DDB1     | PLDN         | NUP98     |
| ZFYVE9   | PDS5A        | SCFD2     |
| USP15    | AGAP1        | C3orf38   |
| CWC22    | EIF4G2       | EP300     |
| RAB28    | CASK         | C7orf60   |
| JRKL     | CCDC115      | TSHZ1     |
| BMPR1A   | SEC22A       | OR2A7     |
| TTC5     | GTF2IP1      | SLC35F5   |
| MOBKL1A  | RBM7         | CTNNA1    |
| SLC4A1AP | ZNF136       | TMX3      |
| FBXW11   | TBC1D3       | TTL       |
| TMX1     | ZSWIM4       | HEATR6    |
| POLK     | C4orf41      | TCF20     |
| FUBP1    | ZNF317       | ZNF689    |
| MARK2    | ZNF2         | DDX20     |



|           |           |           |
|-----------|-----------|-----------|
| FAM175B   | ALMS1     | CCT6A     |
| SMG7      | ZBTB22    | C5orf41   |
| USO1      | ZNF574    | TMEM206   |
| SNRNP200  | COMMD2    | POLA1     |
| TADA2A    | TEX261    | ZSCAN29   |
| PRPF38B   | CSTF2T    | MADD      |
| CSNK1A1   | LARP1     | SNX27     |
| SS18      | LRPPRC    | PHF14     |
| MPZL3     | MTX3      | PHF20L1   |
| ADCY6     | CTDSP1    | PNO1      |
| CDK19     | UTP20     | GTF2H3    |
| NPTN      | DHX35     | TRA2B     |
| FRG1B     | RAB3IP    | C12orf4   |
| DDX5      | ASAP2     | DPF2      |
| HEATR5B   | MLL3      | FRYL      |
| FBXL20    | RBM26     | AP2B1     |
| MAN1A2    | TRUB1     | PAPD4     |
| ERCC4     | TSC1      | PARP8     |
| NCOA1     | CFLAR     | IQCE      |
| ATXN1L    | ZNF749    | IKZF4     |
| CLCN3     | BTRC      | ZNF616    |
| ESYT2     | SPOPL     | SETD1B    |
| ZNF2      | ASB3      | SLC7A1    |
| ZNF225    | ZFYVE20   | XRCC5     |
| KIAA1279  | LOC400657 | RBM25     |
| SRBD1     | INTS3     | FBXO28    |
| APAF1     | C1orf109  | ANKS1A    |
| UBA3      | DENND5A   | CRYBG3    |
| CCDC111   | METTL9    | NSUN3     |
| DCUN1D1   | C5orf43   | DYNC1I2   |
| QTRTD1    | HAUS2     | UBE4A     |
| METTL4    | SNX6      | GAPVD1    |
| ZNF324B   | KIN       | SLC36A1   |
| SMARCE1   | ANKRD26   | MTMR2     |
| YWHAQ     | ZNF3      | UBR7      |
| KIF2A     | DGCR8     | MON1B     |
| COPB2     | POLR1B    | TEAD1     |
| ZNF664    | FCF1      | WHSC1     |
| SMAD2     | C20orf194 | GLG1      |
| GOLGA2    | ZMIZ2     | PTPN4     |
| CCDC55    | UBAP2     | MAPK1IP1L |
| C1orf124  | C7orf70   | CDK13     |
| MLL       | PTAR1     | KIF3A     |
| YEATS2    | KIAA0247  | TBC1D5    |
| ZNF527    | RBM18     | KIAA1797  |
| ZNF281    | TTC9C     | COL4A3BP  |
| ZFYVE20   | SLC7A6    | FCHSD2    |
| ISG20L2   | EPS8      | XPR1      |
| C14orf135 | YME1L1    | PKN2      |
| C3orf38   | FRYL      | DENND1B   |
| ZMYM6     | CCDC132   | ZNF319    |
| KDM6A     | TRAPPC2   | SLC30A5   |
| RPE       | LRRC37B   | CORO1C    |
| FCF1      | RSL1D1    | FAM104A   |
| RASA1     | PBX2      | VKORC1L1  |
| TLK2      | ZNF235    | TRNT1     |
| ZNF445    | ZNF224    | APC       |
| MLLT4     | TIA1      | PACSIN2   |

|           |           |          |
|-----------|-----------|----------|
| POLI      | VPS26A    | BAT2L1   |
| VPS8      | RCOR3     | JOSD1    |
| RBM18     | LOC646762 | RPA1     |
| RAD51L3   | TECPR2    | NIPAL3   |
| MCM3AP    | BCOR      | UBTD2    |
| WDR20     | RSBN1L    | NAT10    |
| DIDO1     | MTMR2     | DIMT1L   |
| CCDC132   | TCF3      | PHF20    |
| HNRNPA2B1 | MED13L    | UBE2W    |
| USP12     | NOL8      | C11orf57 |
| MFAP1     | TJAP1     | RBM16    |
| ZNF224    | SET       | SCLT1    |
| ANKS1A    | TAOK2     | BRMS1L   |
| SEC23B    | BTBD9     | PTGFRN   |
| SPTLC1    | VPRBP     | HAUS3    |
| EVI5      | ZNF84     | GTF2E1   |
| NEK7      | STAG1     | URB1     |
| ZKSCAN4   | PFDN1     | ORC4L    |
| ZCCHC8    | MKS1      | WDFY1    |
| RNF214    | DOCK7     | FXR1     |
| VHL       | TRIO      | FOSL2    |
| SFRS14    | ABL2      | PTPN1    |
| USP32     | SLC12A6   | SLU7     |
| C17orf85  | ZMYND8    | CHM      |
| ZNF84     | TMUB2     | PUS7     |
| ADAT1     | ZRANB2    | RAB11A   |
| USP39     | ISY1      | WNK1     |
| GMEB1     | TTF1      | AP4E1    |
| MYO6      | GPN1      | BBS7     |
| C9orf41   | ZBTB5     | METTTL2B |
| PMS2CL    | POLDIP3   | CP110    |
| PEX13     | AP3B1     | ASH1L    |
| RRP1B     | C17orf80  | DPY19L3  |
| PDZD8     | IMPACT    | PIGK     |
| PNN       | CEBPZ     | INTS12   |
| DDX3X     | LOC728643 | KIAA1109 |
| MUDENG    | ALS2CR8   | SUZ12    |
| UTRN      | PHF15     | ZCCHC11  |
| KIAA0317  | VGLL4     | CTNND1   |
| RG9MTD3   | ZBED5     | SNRNP200 |
| CEP110    | ITSN2     | RAB18    |
| GGA3      | SFRS3     | RBM28    |
| DHX33     | CIR1      | C8orf37  |
| SFRS3     | SPTLC2    | UHMK1    |
| CLASP2    | PAFAH1B2  | AASDHPPT |
| PRKRIR    | GBF1      | KIAA0406 |
| NIN       | CNP       | SCARB2   |
| ZNF436    | POMT2     | COPG     |
| EIF2C4    | PSME3     | MSH2     |
| TAB2      | PDGFC     | ZNFX1    |
| BTBD10    | FAM49B    | ZNF384   |
| TBCCD1    | MIER1     | ATP6V0A2 |
| CRLF3     | ZNF687    | ATG3     |
| ZC3H14    | ZHX2      | PPP4R1   |
| RBMXL1    | LOC493754 | PPP5C    |
| EIF4E     | NCL       | RYK      |
| CEP63     | IRF2      | COG6     |
| SKI       | KTN1      | NAPG     |

|          |           |           |
|----------|-----------|-----------|
| KLHL20   | C5orf54   | TSGA14    |
| AP2A2    | TOPORS    | COMMD2    |
| ZNF434   | ZNF461    | TEX261    |
| SPIN4    | SFRS2     | ADO       |
| ZNF267   | UTP3      | SNX2      |
| KCTD20   | RHBDF2    | ATM       |
| C11orf46 | BCDIN3D   | MFSD1     |
| CRKL     | FAM48A    | KLHL12    |
| PIGK     | RBM15     | ANKRD5    |
| ZNF493   | PCGF3     | NIPA1     |
| RANBP9   | TTC21B    | METTL4    |
| KIAA1430 | PRPF39    | CASP2     |
| ZC3H7A   | BAZ2B     | FAM161B   |
| UHMK1    | ARL6IP5   | FNBP1L    |
| NR3C1    | GSPT1     | ARF6      |
| DIS3     | KBTBD4    | ARIH1     |
| UBE2G2   | HKR1      | TMEM170A  |
| FNBP4    | ZCCHC11   | FTSJD1    |
| NAF1     | RGPD6     | ZNF627    |
| PVRL3    | DCK       | TRUB1     |
| ETNK1    | PIAS3     | COPG2     |
| PRKCA    | ZNF343    | GOLGA2    |
| CCDC66   | SPATS2    | RSBN1     |
| MTMR6    | ZNF618    | ZNF143    |
| RAB2B    | SS18      | GDE1      |
| APPL2    | PCF11     | WDR37     |
| TCERG1   | ZNF526    | MEF2A     |
| TTC33    | MGEA5     | KIAA2026  |
| PKD1     | ZNF398    | BRAP      |
| CRYZL1   | ATF6B     | DVL3      |
| C7orf42  | LOC642852 | FGFR1OP2  |
| TMEM209  | SNX25     | TM2D1     |
| ADO      | KIAA1012  | ATE1      |
| KHSRP    | SVIL      | LARP4B    |
| ZFP64    | CEP164    | SMARCAL1  |
| CASP2    | PPP4R1    | USP3      |
| RAB5B    | SLC22A5   | MAP3K3    |
| WBP11    | SCAMP4    | ACBD3     |
| POFUT2   | BAHD1     | DDHD2     |
| BIRC2    | ESYT2     | UBN1      |
| NAA40    | ACTR2     | POLR1B    |
| ARFIP1   | C17orf103 | C20orf194 |
| ZNF782   | RBM33     | STAMBP    |
| PPIP5K2  | ZBTB45    | FLII      |
| TBK1     | USP37     | CSNK2A1   |
| GON4L    | WDR11     | POLI      |
| DENND5A  | C3orf63   | TRAPPC10  |
| ZKSCAN5  | CIC       | LATS1     |
| TADA2B   | CBX5      | PRMT3     |
| IPP      | FAM161B   | CUEDC1    |
| HDHD2    | IFT52     | ZNF326    |
| CXorf23  | TRIM33    | DPAGT1    |
| ZMYM5    | ARF6      | PRKAG1    |
| FBXO3    | SMC3      | RAB7A     |
| PIAS1    | POGZ      | EPS8      |
| MFN1     | KIAA0494  | MED12     |
| CSNK2A1  | VEZT      | CBX1      |
| THAP9    | ZNF514    | TNRC6B    |

|           |          |           |
|-----------|----------|-----------|
| LPP       | RCOR1    | BRPF1     |
| SERINC3   | TMED8    | HMG20A    |
| ZNF260    | BCL10    | C10orf118 |
| NFATC2IP  | PPIP5K1  | DDX1      |
| SFRS18    | ZNF836   | WDR45L    |
| AGGF1     | CCNG2    | RUFY3     |
| PEX26     | ZMYM6    | BAT2      |
| STIM2     | PARN     | KDM5C     |
| BUD13     | SLK      | PDPR      |
| MAP3K7    | OFD1     | PKNOX1    |
| NUDT21    | FAM175A  | ERCC3     |
| B3GNT2    | FKTN     | HSPA13    |
| RNF141    | C12orf41 | XPNPEP1   |
| VPS26A    | WDR92    | STK4      |
| KDM5C     | TTL      | OXSRI     |
| PLEKHA7   | HEATR6   | VPS24     |
| LOC651250 | STAMBP   | THAP6     |
| SRPK2     | RBAK     | CAST      |
| NUMA1     | SMAD6    | DNAJC10   |
| NAA25     | YPEL2    | ZNF646    |
| KDM3A     | SPATA5L1 | CCDC43    |
| LMBR1     | NGRN     | PSMD11    |
| TEAD1     | PAFAH1B1 | C17orf85  |
| MKLN1     | PPP1R8   | EEF2K     |
| C15orf44  | ANKRD42  | POLR3A    |
| GPR107    | VPS11    | OGFOD1    |
| TBC1D5    | C16orf88 | BICD2     |
| BCL2L2    | CREBZF   | USP39     |
| LATS2     | VPS8     | NRD1      |
| MSI2      | CCDC142  | UTP15     |
| HNRNPL    | THAP2    | USP8      |
| BTN2A1    | UBE2R2   | LRRRC58   |
| ZNF182    | SNX27    | SLC12A6   |
| C17orf80  | SFT2D3   | MDM1      |
| RSPH3     | DUT      | ARMC10    |
| SPOP      | CDC73    | SEH1L     |
| ABHD13    | MIB1     | CXorf38   |
| KIAA0226  | WDR20    | DHX9      |
| AP1AR     | CBX1     | ZFC3H1    |
| ZNF585B   | ATXN7    | CYB5RL    |
| SNX4      | NCOA5    | UBQLN1    |
| PIP5K1A   | BRD2     | PRR12     |
| TINF2     | AGBL5    | C13orf23  |
| BRWD3     | NKIRAS2  | CEP170    |
| TMEM194A  | SPRED1   | CELF1     |
| AKAP13    | SPIN1    | PRKACB    |
| CCDC121   | FAM131A  | TRA2A     |
| ZNF828    | OGT      | PHTF1     |
| KIAA1310  | FAM108C1 | TMEM167B  |
| PHF21A    | STK35    | HEATR2    |
| ELMO2     | OXSRI    | RUFY2     |
| TOB2      | MKL1     | NRAS      |
| ZDHHHC6   | WHSC1L1  | ZBTB8A    |
| ZNF146    | COG1     | EIF2AK3   |
| RAB5A     | C1orf58  | PLEKHM1   |
| KIAA0232  | GLG1     | PTPRA     |
| SKIV2L2   | NFYA     | BRWD3     |
| MED21     | FAM120A  | DENND4C   |

|           |          |                 |
|-----------|----------|-----------------|
| DOPEY1    | PTPN4    | LMAN1           |
| NEK4      | POLR3A   | ZEB1            |
| EFCAB7    | RSPRY1   | SLC25A46        |
| MTMR9     | ZNF765   | CIAO1           |
| MBNL1     | FAM171A1 | STK17A          |
| KCTD7     | KIAA1217 | SEC14L1         |
| FAM48A    | CGGBP1   | CXorf56         |
| LIMS1     | C15orf29 | ZNF146          |
| ZC3H12C   | DALRD3   | CASC4           |
| POLD3     | KLF7     | TNKS2           |
| GCN1L1    | FRMD8    | C9orf30         |
| NOM1      | ZNF37A   | TBCCD1          |
| CHUK      | YEATS4   | EIF4E           |
| ZNF234    | ZNF182   | SNX18           |
| RNASEN    | TASP1    | SEPT2           |
| JKAMP     | MAPRE1   | NCL             |
| PCF11     | NBR1     | ADAR            |
| C14orf4   | BRD8     | IRF2            |
| TMEM30A   | RG9MTD3  | RAB28           |
| TIAL1     | SPOP     | MSN             |
| LOC642852 | TMEM167B | SMC1A           |
| EXOC2     | MARCH8   | PPHLN1          |
| ZNF384    | CASP8    | RNF19B          |
| PDCD7     | PIP5K1A  | ANKRD11         |
| NAA16     | FAM53C   | KCTD20          |
| CDC42SE1  | C1orf77  | SMU1            |
| PLAA      | HNRNPH3  | KIAA1328        |
| SF1       | ANKRD13C | RSRC2           |
| GNL3L     | SLC30A6  | ATMIN           |
| TNPO3     | UBTD2    | SGPP1           |
| JAK1      | CENPC1   | G3BP1           |
| DHX35     | VPS13B   | HMGNA4          |
| SLC33A1   | CCNY     | ANKHD1-EIF4EBP3 |
| PPIL4     | CCDC52   | SMCHD1          |
| POGZ      | BTBD10   | EIF2C3          |
| ARL6IP6   | RBMXL1   | CCNDBP1         |
| VTI1A     | EIF4E    | POT1            |
| TTC30B    | TACC1    | U2AF2           |
| ZNF548    | PPP1CB   | RNF216          |
| ZNF268    | MED15    | BAZ2B           |
| EHMT1     | KDM2B    | RBBP8           |
| ZNF507    | HAUS3    | NUP107          |
| H2AFV     | AP2A2    | DNTTIP2         |
| EIF4H     | ZNF17    | PCBP2           |
| ZNF749    | NSUN4    | NBN             |
| CCNG2     | GMPR2    | FOXJ2           |
| SMYD4     | AMBRA1   | TMTC3           |
| LNX2      | SMARCD1  | STRAP           |
| UBE3C     | ATAD2B   | FANCF           |
| FCHO2     | VIPAR    | CBFB            |
| PPWD1     | CD58     | ABI1            |
| USP3      | TNKS     | MAPKSP1         |
| SCYL3     | KIF3B    | PGAM4           |
| C4orf42   | ZMYM3    | WAPAL           |
| ACBD3     | RBM22    | HP1BP3          |
| PSMD5     | KCTD7    | KLHL7           |
| MAGI1     | KIAA1328 | HEATR5B         |
| TCHP      | STRN4    | RBM7            |

|           |           |          |
|-----------|-----------|----------|
| WDR92     | HDGF      | POLR1A   |
| PURA      | SETX      | NOTCH2   |
| TMEM50B   | INPP5E    | ELK4     |
| NUMB      | TMEM87B   | SMURF2   |
| PMS1      | FRS3      | C13orf31 |
| TNPO2     | COBRA1    | APPL2    |
| KIAA1712  | DAZAP2    | C12orf5  |
| DDX52     | FAM175B   | PRPF8    |
| VPS11     | WHAMM     | RPRD1A   |
| SMC2      | RAB18     | TRMT61B  |
| IWS1      | TLL5      | SEPT10   |
| PIP4K2B   | GEMIN8    | USP16    |
| CAMSAP1L1 | CPSF7     | CDC42SE1 |
| SFRS4     | PPIG      | SRBD1    |
| ZNF772    | BTBD2     | RNF138   |
| ELAVL1    | HNRNPM    | HEATR1   |
| FBXO38    | LOC441208 | SF1      |
| DNAL1     | CTDSPL    | GPD2     |
| CCDC50    | ZNF443    | SUDS3    |
| PHF3      | DDX5      | RFX7     |
| HAUS6     | EXOC3     | PDE12    |
| RNF20     | DUSP18    | NOC3L    |
| ERCC3     | TXLNG     | KLHL9    |
| OXSRI     | APPL2     | KCTD10   |
| RAD23B    | TRAK2     | RBM26    |
| NRF1      | TGS1      | VPS53    |
| FAM120A   | CEP192    | BIRC2    |
| EEF2K     | SOX4      | SMG1     |
| POLR3A    | UBE2I     | PIP5K1C  |
| CDK2      | LARS      | BPGM     |
| RSPRY1    | MOBK3     | PPP5K2   |
| RAB10     | PTBP1     | KDM1B    |
| RNF34     | HEATR1    | C1orf124 |
| TRIM37    | GNL3L     | IDE      |
| UACA      | UHRF1BP1  | SPOPL    |
| DHX9      | SUMO2     | CCNG2    |
| C21orf91  | TNPO3     | ISG20L2  |
| KIAA0649  | ZNF587    | SEC22B   |
| YTHDF1    | ZNF324B   | IFT81    |
| FAM76B    | DCAF5     | TULP3    |
| DYNC1H1   | TAB1      | PSMD12   |
| PLEKHM1P  | NIF3L1    | MCART1   |
| IMPACT    | MAP2K7    | WDR92    |
| BMS1      | PPP6C     | TBL1XR1  |
| ALS2      | REST      | PRDM10   |
| TFAM      | PACRGL    | ELOVL1   |
| TBCEL     | RBBP4     | TLK2     |
| ZNF615    | C10orf88  | CHMP5    |
| ADAM17    | DVL3      | ZNF609   |
| ZNF704    | MBD6      | TCP11L1  |
| SWAP70    | ACTR1B    | DENND4A  |
| NRIP1     | PAPSS1    | AP3M1    |
| CASC3     | ZNF791    | GLYR1    |
| CASD1     | UBE2Q1    | NFATC2IP |
| GZF1      | SLMAP     | RBM18    |
| NPEPPS    | MAP3K3    | TNFAIP2  |
| SBF2      | TSHZ1     | LRIG2    |
| CLINT1    | NUP133    | G2E3     |

|           |           |           |
|-----------|-----------|-----------|
| RPA1      | TMX3      | ZNF484    |
| UBTD2     | MFN1      | ATXN7     |
| IPO9      | ZBTB10    | PPP3R1    |
| PHF20     | RAB22A    | RAB3GAP2  |
| SAFB2     | CANT1     | CSNK1G1   |
| SNX18     | C2orf60   | MGC2752   |
| NEK9      | YARS2     | BAG4      |
| KDM2B     | UBLCP1    | UBE3A     |
| AMBRA1    | ZNF20     | HSPA4L    |
| ZFP106    | MADD      | PAXIP1    |
| DYNC1LI2  | GABPA     | ARPC2     |
| HACE1     | HNRNPC    | ANKFY1    |
| MTF1      | NFIX      | HNRNPH2   |
| ZNF516    | TSG101    | TTC30A    |
| ZNF461    | RARG      | FAM98A    |
| RIT1      | DTWD1     | FRS2      |
| PAK2      | SMAD5     | SGK269    |
| TRAPPC6B  | PIKFYVE   | CDK17     |
| PRPF39    | CAND1     | QRICH1    |
| HNRNPD    | TRA2B     | SET       |
| ATXN1     | DIDO1     | TWSG1     |
| PIAS3     | ZNF767    | KDM4A     |
| RALGAPA2  | ENOPH1    | TM9SF3    |
| DENND4B   | BRPF1     | SKIL      |
| RP2       | PPP3R1    | FAM13B    |
| ABI1      | IQCE      | SLC37A3   |
| ZNF674    | KIAA0182  | EXT2      |
| LOC441208 | DNAJC27   | SNIP1     |
| SUPT6H    | C14orf118 | PRPF4B    |
| CAPN7     | BUD13     | CGGBP1    |
| EIF4G3    | METTL3    | C15orf29  |
| ROCK2     | CTTNBP2NL | ZNF134    |
| C4orf29   | SF3B3     | ELMOD2    |
| AKAP2     | ERC1      | GTPBP8    |
| ATP6V0A2  | NRP1      | GRB10     |
| RRAGC     | CCDC50    | GCC1      |
| CDC40     | CYTH2     | FRMD8     |
| CEP290    | PKNOX1    | GNPDA2    |
| SPIN3     | ZNF597    | RELA      |
| ZNF675    | ZNF451    | IER3IP1   |
| KIAA1530  | STK4      | MAP2K1    |
| PRKCI     | RAB5C     | ECD       |
| DCLRE1B   | THAP6     | TET3      |
| GRSF1     | VHL       | PPP3CA    |
| INVS      | LZTFL1    | ABI2      |
| TNS1      | SP4       | SLC7A6OS  |
| EZH1      | MAPK1IP1L | SF3B2     |
| CIC       | ARHGAP29  | ECT2      |
| TLN1      | JUP       | C10orf119 |
| CNOT6     | DNAJB14   | DDX31     |
| PDCD6IP   | ARHGEF12  | PJA1      |
| LINS1     | TBC1D5    | SETD1A    |
| PTPLB     | MASTL     | TECPR1    |
| RAPGEF2   | POGK      | RASSF3    |
| TRAK1     | SELT      | ACTL6A    |
| RALBP1    | MLLT10    | ZNF704    |
| KIAA1958  | YIPF5     | CMIP      |
| C11orf58  | RNF19A    | DHX33     |

|           |           |          |
|-----------|-----------|----------|
| ZNF410    | TMED4     | CASD1    |
| LOC400657 | PISD      | ITGAV    |
| ZNF558    | CNOT6L    | CWC27    |
| BRAP      | MTMR1     | TXNL1    |
| RIPK1     | CELF1     | UBAP2L   |
| GXYLT1    | HPS4      | GGNBP2   |
| ATE1      | DSTYK     | BECN1    |
| QKI       | PTTG1IP   | ZNF436   |
| TANK      | TFAM      | DCTN5    |
| CCDC14    | DDX31     | FAM119B  |
| SLC35F5   | ESCO1     | ERBB2IP  |
| WDFY3     | NUAK2     | C19orf55 |
| RNF146    | ZBTB3     | AGPS     |
| HEATR6    | SLC39A1   | CUL4B    |
| YPEL2     | MRPL30    | GRPEL2   |
| ZNF248    | PRKD3     | RBBP7    |
| PAFAH1B1  | ITGAV     | DDX21    |
| ZNF8      | HNRNPUL1  | UNC50    |
| PPP1R8    | ZNF621    | MBP      |
| RPAP3     | ZNF292    | RGPD3    |
| ZNF518A   | LAMC1     | MTX2     |
| RFWD3     | MTPAP     | ZNF17    |
| AP3M1     | SPATA5    | SMARCD1  |
| GLYR1     | PRPF38A   | STAG2    |
| RBMX      | SCAMP2    | CMTM1    |
| ATG16L1   | RALGAPA1  | ERMP1    |
| TMEM168   | BECN1     | ARHGEF18 |
| FXC1      | STK17A    | GTF3C2   |
| CBFA2T2   | SEC23IP   | MBNL1    |
| MED12     | SFRS6     | ZNF766   |
| ZC3H6     | RAB5A     | ANKIB1   |
| RBM9      | TRIM56    | MBD5     |
| LOC653501 | SEPT7     | PPP1R2P3 |
| SLC5A3    | HNRNPH1   | LRBA     |
| ME2       | EXOC4     | C7orf49  |
| RAB3GAP2  | TRAF6     | ZNF561   |
| DNAJC27   | IPPK      | IKBKB    |
| ZNF606    | RBM16     | PHACTR2  |
| FBXO28    | RABL5     | ARFGAP3  |
| ERC1      | STX6      | SMG7     |
| CYFIP1    | BRD3      | SYPL1    |
| PDPK1     | SAFB      | SLC30A9  |
| YAP1      | LBR       | REEP3    |
| DPY19L1   | SMYD5     | MAP3K1   |
| ING3      | YY1AP1    | CRTC3    |
| GPATCH2   | TCTN1     | ZNF654   |
| NR1D2     | MPZL1     | IRAK4    |
| PTPN4     | DENND5B   | C2orf49  |
| SETBP1    | PELI1     | EXOC2    |
| SNRNP48   | RQCD1     | SNW1     |
| C16orf72  | PTPN1     | URB2     |
| BICD2     | DHX57     | DCTN4    |
| BMI1      | FAM116A   | MKL2     |
| WRB       | SECISBP2L | NCOA1    |
| TPP2      | C15orf57  | ARHGAP5  |
| BCL9      | ASB6      | PPP2CA   |
| YIPF5     | STX16     | KCTD18   |
| RLIM      | ATMIN     | IREB2    |



|          |          |           |
|----------|----------|-----------|
| KPNA6    | WDSUB1   | EZH1      |
| C13orf23 | USP7     | DCUN1D1   |
| PAPOLA   | EFHC1    | RAB12     |
| EP400    | PPP1R2P3 | CDV3      |
| SIKE1    | MYST3    | CBX5      |
| ARHGAP32 | DNMT3A   | SMARCE1   |
| FAM200A  | DNTTIP2  | CLCC1     |
| TRA2A    | NUP214   | SMC3      |
| MPP5     | NOM1     | CCT8      |
| MTMR15   | KIAA1430 | ZZEF1     |
| PIAS4    | CDK6     | RAB5B     |
| ZBTB3    | TUFT1    | BRCC3     |
| TAF2     | DENND4B  | EIF2B2    |
| TROVE2   | MLLT1    | FASTKD2   |
| GOLIM4   | FNBP4    | SYNCRIP   |
| CUL2     | RNF121   | DDX10     |
| MUTED    | ZBTB49   | MTIF2     |
| ZNF383   | PTCD3    | INADL     |
| VPS13B   | DIP2A    | PPIP5K1   |
| LMAN1    | ZNF510   | DDX47     |
| CHD9     | MFF      | RAI1      |
| TAOK3    | COPS4    | CAD       |
| LARP7    | RHBDF1   | ESF1      |
| POLG     | MED14    | ANKRD50   |
| CASC4    | TLK1     | FBXO18    |
| TRIM56   | KLHL28   | CAPN1     |
| UBE2J1   | ZNF710   | PSMD5     |
| MBTPS2   | NOTCH2   | CHMP2B    |
| TMOD3    | ANKMY1   | ELF1      |
| KTN1     | UNC119B  | ZNF480    |
| STARD7   | ZNF263   | KIF1B     |
| SMAD3    | PAK4     | CNOT2     |
| PRKAR2A  | ZNF567   | FBXO34    |
| TMPO     | WDR3     | TCHP      |
| TNKS     | TBC1D23  | SEC22C    |
| DENND5B  | ZNF416   | USP33     |
| NUP50    | SMARCC1  | CRAMP1L   |
| KIF3B    | NAPG     | RAB22A    |
| SFRS2    | SFRS13A  | MIER3     |
| CHM      | ZNF721   | ZNF8      |
| GDAP2    | MYNN     | ZNF543    |
| KIAA0495 | DYNLL2   | RNF2      |
| ZNF766   | SMARCA5  | WDR36     |
| FIGNL1   | PLS1     | C16orf88  |
| CEP76    | IFNGR2   | GABPA     |
| TMEM128  | SFRS8    | KIAA0247  |
| ZFHX3    | CCDC111  | TAF1      |
| KLHL24   | SUDS3    | NOL9      |
| RBM15    | ASB7     | SLC38A1   |
| PCGF3    | TMF1     | IFT57     |
| UBR3     | ZNF785   | WASF2     |
| PPP1R2P3 | ALCAM    | TNFRSF10A |
| ANKRD52  | KIF2A    | WDR20     |
| CCDC6    | HEXIM1   | HSPA8     |
| EIF2C3   | PDCD6IP  | CNOT7     |
| DPY19L3  | C11orf61 | C12orf32  |
| KIAA1841 | C1orf83  | VPS35     |
| RERE     | RGL2     | GOSR2     |

|          |           |           |
|----------|-----------|-----------|
| ANKHD1   | PIGC      | ATP10D    |
| N4BP1    | AKAP11    | LOC441089 |
| C10orf46 | C14orf106 | SRRM2     |
| COIL     | RLF       | SF3B3     |
| PER2     | TEAD3     | SPTLC1    |
| ZNF618   | ZNF92     | SOCS6     |
| C5orf44  | RAD52     | FAM168B   |
| MSH2     | ZNF644    | REV1      |
| ZNF770   | ZNF329    | TECPR2    |
| ZBTB49   | RNF220    | MAN2A1    |
| WDR89    | UEVLD     | TJP1      |
| ZNF623   | PIK3CB    | SPIN1     |
| MFSD8    | VRK2      | ZNF597    |
| ATF7     | TANK      | TGOLN2    |
| AHNAK    | FBXO3     | ORC2L     |
| BCL7A    | THUMPD3   | NAA25     |
| KAT5     | NLK       | KDM3A     |
| AKAP8    | C2orf68   | LOC285033 |
| GNAI3    | SH3RF1    | PCNT      |
| SEPT10   | PMS1      | ING3      |
| ATP11A   | THAP9     | SFRS14    |
| COMMD2   | ZNF445    | VPRBP     |
| KCTD18   | COG7      | RALB      |
| MARCH5   | ACTR3     | TRIM4     |
| DYNLL2   | LNPEP     | PAN3      |
| ZBTB39   | RCC2      | PPM1G     |
| ARAP2    | PLEKHA3   | BMI1      |
| ANKRD5   | ATN1      | TSTD2     |
| ZNF613   | OSGEPL1   | MAEA      |
| FAM161B  | MTA3      | ZNF304    |
| UTP20    | MDM4      | RAP1A     |
| FNBP1L   | CBFA2T2   | ABL2      |
| KIAA1009 | C12orf32  | MSL3      |
| ZZEF1    | FLJ45340  | POGK      |
| PROX1    | KPNA4     | CDC42     |
| TEP1     | C9orf129  | SETD5     |
| ZNF564   | C2orf43   | CREB3L2   |
| KDM1B    | IKZF4     | PRPF4     |
| PREPL    | ZNF616    | TYW3      |
| BCL10    | C10orf118 | CHTF8     |
| SSH2     | RIC8B     | SLC9A6    |
| ZFP30    | FBXO38    | BTN2A1    |
| C1orf109 | FBXO28    | ZNF182    |
| SMCR7L   | TRMT5     | WDR12     |
| DVL3     | ZNF652    | LCMT2     |
| PIAS2    | MED20     | METAP1    |
| C5orf43  | C22orf46  | SIKE1     |
| LARP4B   | UHRF2     | GFPT1     |
| FRMD4B   | LOC651250 | NOP14     |
| PRDM2    | PDCD10    | INPP4A    |
| DDX18    | EIF2C1    | ARL8B     |
| MCART1   | EDC4      | AP1AR     |
| BTBD1    | TRIM44    | THOC2     |
| USP33    | RUSC2     | CASC3     |
| RAB22A   | LIG3      | ZNF138    |
| DHX29    | LOC285033 | PPP1CC    |
| C2orf60  | DNAJC10   | GZF1      |
| ASB8     | COX15     | CCDC121   |

|           |           |           |
|-----------|-----------|-----------|
| ZNF20     | WHSC1     | GMPS      |
| PHRF1     | SNRNP48   | GRB2      |
| KIAA0247  | MUS81     | RAB5A     |
| ZNF512    | CTDP1     | SAFB2     |
| SNX27     | MTF2      | ERCC8     |
| USP21     | TNPO1     | ALS2CR4   |
| TTC9C     | RBM5      | C12orf11  |
| HIP1      | ZDHHC21   | PPP2R2A   |
| ENOPH1    | SCAF1     | LOC493754 |
| SLC35E1   | POLR3F    | ZNF121    |
| FKBP15    | USP39     | NAB1      |
| CSNK1G1   | FBXW8     | HELZ      |
| MCM8      | SNIP1     | KLHL20    |
| DICER1    | DBNDD2    | UPF2      |
| DHX40     | ARMC10    | KTN1      |
| TECPR2    | DUSP11    | WWC2      |
| ZNF451    | PDZD8     | AMBRA1    |
| WDHD1     | MSI2      | ATAD2B    |
| UBXN2A    | FAM172A   | PRKAR2A   |
| USP14     | ERCC6     | ARHGEF35  |
| XRN2      | ANGEL2    | FAM59A    |
| THAP1     | EIF4A2    | IPMK      |
| KDM2A     | PIGW      | RIOK3     |
| NFYA      | KPNA6     | IQGAP1    |
| PARP4     | CEP250    | C15orf57  |
| C20orf117 | LLGL2     | CDKN2AIP  |
| TTC14     | SENP7     | INO80D    |
| DOCK7     | KIAA0892  | ARFGEF2   |
| ABL2      | ZXDC      | DMTF1     |
| RBM23     | FAM120AOS | BAT2L2    |
| POGK      | FAM104A   | DAZAP2    |
| MAPK9     | ANAPC10   | BRD7      |
| ZSWIM6    | MTAP      | ARL6IP5   |
| ZRANB2    | MYST4     | RTCD1     |
| CREB3L2   | OSBPL2    | ZNF746    |
| ENTPD4    | HNF1B     | N4BP1     |
| GNPDA2    | PIAS4     | CD47      |
| SLC30A5   | DNM1L     | LDB1      |
| NFX1      | EIF1AD    | PRDM4     |
| ZNF28     | SCMH1     | PPIG      |
| UBR2      | SETD2     | PRPF38B   |
| FOXO3     | SYNE2     | DIS3      |
| VTA1      | MRRF      | RAP1B     |
| TTC37     | SIPA1L3   | C5orf44   |
| C1orf55   | FLNB      | TMEM188   |
| AHCYL1    | LAMA5     | INTS4     |
| ASTE1     | GMEB2     | NPTN      |
| CEBPZ     | KIAA1804  | B3GALNT2  |
| NR2F2     | SUMO1     | CASK      |
| NUCKS1    | ZEB1      | SNX17     |
| TYK2      | NAT10     | ATF7      |
| AZI2      | USP6NL    | PGBD3     |
| R3HDM1    | LARP7     | SLC37A1   |
| SETD2     | GRPEL2    | RINT1     |
| MYH9      | KIAA0368  | ERCC4     |
| LOC440354 | ARHGAP26  | SHQ1      |
| LEPROT    | LCLAT1    | RAB6A     |
| SIPA1L3   | OBFC1     | RPS6KA4   |

|          |            |          |
|----------|------------|----------|
| MCM9     | NCOR1      | TGS1     |
| JMJD1C   | MED21      | MCM4     |
| SEPT8    | WARS2      | C1orf144 |
| C19orf55 | ANKZF1     | ATXN2L   |
| ZNF350   | HIVEP1     | ZNF776   |
| ITSN1    | ZNF434     | ZNF721   |
| ADAR     | LRTOMT     | DYNLL2   |
| BMP2K    | LOC148189  | APAF1    |
| SENP5    | IPO8       | BCAR1    |
| URB1     | EFTUD2     | C3orf63  |
| LSG1     | ATG9A      | GDI2     |
| UTP3     | ZNF267     | ZFP64    |
| VANGL1   | PTMA       | DOCK5    |
| SFRS11   | CAPZA1     | MLH3     |
| HMGNA4   | ZBTB1      | ZNF324B  |
| PJA2     | RIT1       | DCAF5    |
| UTP14C   | CSNK1G3    | LIN52    |
| UBE2D3   | ZNF133     | ASAP1    |
| ASXL1    | PAK2       | AMMECR1  |
| PCBP2    | SGPP1      | CWC25    |
| NUP205   | HNRNPR     | TMED8    |
| RAB18    | ANKRD52    | SHOC2    |
| MORF4L1  | UBE2D3     | HAT1     |
| GALNT1   | DPY19L3    | C5orf22  |
| STT3B    | LIMS1      | STAM     |
| CSDE1    | ZFAND6     | BTBD12   |
| AASDHPPT | CALM2      | TANC1    |
| PLEKHA1  | PIGB       | C11orf58 |
| FANCF    | TRIP11     | NBPF1    |
| IQCB1    | YWHAG      | CD46     |
| TOP1P1   | SUZ12      | PHF17    |
| SCAPER   | MZF1       | NUP188   |
| MYO19    | IGBP1      | PPM1B    |
| MAPKSP1  | FAM117B    | PAPSS1   |
| CYLD     | ZC3H15     | TADA2B   |
| WTAP     | GALNT1     | C4orf42  |
| HBS1L    | ANKMY2     | UBN2     |
| AGAP1    | AASDH      | PAQR3    |
| IRAK4    | GABPB1     | ZNF264   |
| RAPGEF6  | UBAP1      | PIAS1    |
| TLK1     | NCRNA00094 | KIAA0240 |
| ELK4     | CDK19      | EXOSC10  |
| AVL9     | SNX17      | PRKAA1   |
| RAB6A    | LUZP1      | STAT3    |
| TRAK2    | CNOT1      | C1orf163 |
| TBRG1    | TERF2      | KCTD9    |
| ZNF823   | CHD7       | VPS37C   |
| KCTD3    | PLEKHB2    | RAD51L3  |
| TBC1D23  | TNFRSF21   | ZBTB44   |
| PASK     | CLCN3      | GOLT1B   |
| NAPG     | POLH       | DCP1A    |
| SH3GLB1  | DLG5       | C9orf25  |
| LRPPRC   | AP1G1      | PRIM2    |
| ZBTB7A   | MOBKL1B    | ITGB1    |
| SLC35B3  | ATP11A     | FNTB     |
| MLH3     | SH3GLB1    | UBE3B    |
| CDV3     | EIF2S3     | DNAJC27  |
| ASB7     | LOC388152  | BZW2     |

|          |          |           |
|----------|----------|-----------|
| PDE12    | ATM      | SFRS4     |
| BAHCC1   | NAA35    | DCAF10    |
| TMEM170A | XPO1     | MAP3K7    |
| NFRKB    | ZNF777   | RAB9A     |
| FBXO30   | CDK5R1   | CTTNBP2NL |
| KDM5B    | KHSRP    | UHRF2     |
| SYNCRIP  | METTTL4  | SLC9A7    |
| MAP2K7   | PSEN1    | BCOR      |
| BRWD1    | UBXN4    | SMURF1    |
| FOXO3B   | ZNF41    | ZNF708    |
| NUP188   | SSRP1    | WDR41     |
| STX12    | ASAP1    | C7orf28B  |
| CASC5    | SMAD2    | COG1      |
| OSBPL8   | SPTY2D1  | TSN       |
| ANKRD6   | MED13    | SKAP2     |
| OSBP     | DNM2     | ZDHC17    |
| IFNAR1   | WWC3     | C16orf57  |
| YTHDC2   | SHOC2    | METAP2    |
| NUP133   | RC3H2    | ALKBH1    |
| ZSCAN12  | GORASP2  | PRICKLE3  |
| NFAT5    | S100BPB  | MYO6      |
| AHCTF1   | EIF4H    | LETM1     |
| THUMPD3  | WASL     | ARNTL2    |
| LRCH1    | STAM     | RFX1      |
| KLHL26   | COG2     | ADAM9     |
| MCPH1    | C17orf75 | ISY1      |
| SETD4    | MTFMT    | STIL      |
| ACTR3    | ISG20L2  | HCCS      |
| TMEM127  | SMYD4    | PPME1     |
| CHMP5    | BRAP     | BAZ1A     |
| FAM188A  | AAMP     | MIOS      |
| SFRS7    | ACIN1    | RBM43     |
| RBM8A    | IFT81    | MTMR1     |
| FBXO45   | FCHO2    | MAPRE1    |
| POM121   | CCNI     | CCDC47    |
| DARS     | CBLL1    | FAM200A   |
| HERC2    | IPP      | SR140     |
| ZNF79    | CAPN1    | DCLRE1A   |
| DPF2     | TTC3     | MTAP      |
| ZNF805   | MAG1     | RB1       |
| SLC30A7  | AMOTL2   | MNT       |
| INPPL1   | PTPN23   | MANBA     |
| WDTC1    | SLC35F5  | MLXIP     |
| SCAND2   | BTBD1    | PHLPP2    |
| SSR1     | SMARCA4  | LIN54     |
| TIRAP    | STAT5B   | GGA3      |
| KIF16B   | USP33    | WDR1      |
| PDPR     | SETD4    | GOLGA1    |
| SPRED1   | DDX20    | DDX42     |
| CRYBG3   | FUBP3    | RNF115    |
| NSUN3    | THAP11   | MSL2      |
| TXNDC16  | SLC35B2  | MAPKAPK5  |
| C9orf64  | SDHAP1   | MED28     |
| ZNF597   | PRR14    | HEATR3    |
| SNAP23   | ARHGEF11 | CEP350    |
| ANKFY1   | VPS37C   | AHCYL2    |
| RAB5C    | UVRAG    | CHMP7     |
| VPS24    | PHF14    | PLRG1     |

|               |          |           |
|---------------|----------|-----------|
| LRRC41        | CTPS2    | ZC3H14    |
| PPP1R15B      | ZNF19    | RBMXL1    |
| EIF1AX        | ZNF326   | CWC22     |
| MAP4K3        | ZNF250   | EEA1      |
| KIAA0776      | TMEM106B | STARD7    |
| MUS81         | PRKAG1   | SENP5     |
| C18orf55      | HELQ     | SFPQ      |
| LOC100129034  | FXC1     | TBC1D12   |
| METAP2        | SERTAD2  | TTC5      |
| ZBED4         | PXN      | MPZL1     |
| ZNF559        | EPS15    | SPIN4     |
| C18orf19      | NAA15    | POLR3E    |
| PDIK1L        | SPAST    | TOPORS    |
| ZNF333        | TNRC6B   | TOX4      |
| FRMD8         | RAB3GAP2 | DHX57     |
| CHTF8         | PLSCR1   | SECISBP2L |
| TOP2A         | KCTD11   | CEP76     |
| SELT          | FKBP15   | BCDIN3D   |
| SRFBP1        | MGC2752  | TMEM128   |
| RASAL2        | TOPBP1   | ZFHX3     |
| ZFP14         | PHF3     | MTMR3     |
| CEP170        | RAB21    | TRIM25    |
| MSH6          | SIAH1    | GOLGA3    |
| WDR19         | FIP1L1   | TMEM87B   |
| AP3B1         | RBBP5    | ZNF107    |
| ARGLU1        | HNRNPA3  | HNRNPD    |
| GFPT1         | UBXN2A   | FAM175B   |
| MTAP          | FAM73A   | MORF4L1   |
| RDH14         | USP14    | ARCN1     |
| THOC2         | SGK269   | RNASEH1   |
| TWF1          | CDK17    | AASDH     |
| MARCH8        | GCA      | NUP153    |
| CASP8         | MGC57346 | CAMK2D    |
| VPS41         | STRN3    | GLT25D1   |
| GOLGA1        | SLC44A3  | GABPB1    |
| HNRNPUL1      | METTTL6  | HEG1      |
| ZNF621        | EML4     | TAF1A     |
| JARID2        | CDK2     | MYO19     |
| SCRN3         | KIF3A    | ZNF286A   |
| ZNF100        | RPAP2    | USP34     |
| GMPS          | SKIL     | MPZL3     |
| DKFZP58611420 | C20orf72 | TRIP4     |
| POC1B         | FAM13B   | C14orf4   |
| ERCC5         | MAEA     | ZNF557    |
| ZNF687        | SPAG16   | ACTR8     |
| LOC100132707  | FGD4     | ZNF510    |
| ALS2CR4       | RNF145   | ROCK2     |
| ZFP36L1       | DSC2     | SF3A3     |
| ATXN7L3       | RBMS2    | NFE2L2    |
| ZNF121        | TRIM65   | TERF2     |
| UNC50         | LASS5    | ZNF136    |
| MED26         | ZFP36L2  | VCP       |
| ARHGEF18      | MORC3    | LOC728024 |
| CASP3         | COL4A3BP | AP1S3     |
| PTPN1         | PCGF2    | CHD2      |
| CAPZA1        | LENG8    | CEP192    |
| METT5D1       | GRB10    | RAB11FIP5 |
| STRN4         | GNPDA2   | ZNF2      |

|           |          |          |
|-----------|----------|----------|
| PPP1R13B  | ANKRD12  | ZNF675   |
| GOLGA3    | SLC30A5  | CWF19L2  |
| METTL2B   | SYNJ1    | SCOC     |
| CCNDBP1   | ZNF800   | COPA     |
| ZBTB4     | ZNF28    | ZBTB2    |
| POT1      | PATL1    | C3orf34  |
| DAZAP2    | USP47    | STX7     |
| GSPT1     | TMEM39A  | WDR60    |
| YTHDF2    | SYNGAP1  | WDR11    |
| NR2C1     | PPP3CA   | GTPBP4   |
| RGPD6     | EP400    | CIC      |
| IKZF5     | AHCYL1   | HTT      |
| RAB11FIP2 | CTNNB1   | ZNF777   |
| UBAP1     | SLC7A6OS | SGMS2    |
| MAP3K1    | NUP35    | ORC5L    |
| MLLT1     | VKORC1L1 | ZNF718   |
| CPEB2     | RCHY1    | PPIL4    |
| TRIP4     | PPP1R9B  | UTP18    |
| RRM1      | SIRT1    | ICMT     |
| UBP1      | VCPIP1   | NIF3L1   |
| ZNF398    | TAF7     | WWC3     |
| ATF6B     | ZNF202   | TIPRL    |
| KIAA1033  | SWAP70   | B4GALT5  |
| EED       | ATP7A    | SSH2     |
| COPS4     | CASD1    | ADAMTS9  |
| DUSP18    | CWC27    | CNN3     |
| NOTCH2    | ZBTB8A   | STXBP5   |
| SUPT16H   | ZNF629   | ZFYVE20  |
| LOC728024 | SBF2     | PNPLA8   |
| PPP4R1    | SEPT8    | DCAF16   |
| SETD3     | EWSR1    | PRRC1    |
| EIF2AK2   | SEMA4C   | C5orf43  |
| PRPF8     | ZNF383   | TMEM131  |
| MIS12     | CRNKL1   | ZNF180   |
| BRAF      | CHD9     | PXK      |
| GEMIN5    | CHD1     | PPWD1    |
| RHBDD1    | FUS      | KIAA0090 |
| ADD3      | ARAP1    | CCDC41   |
| LARP1     | ZNF350   | PIK3CB   |
| PARP2     | PLEKHM3  | QKI      |
| SETDB2    | KIAA0232 | CXorf23  |
| ZNF295    | SPATS2L  | TANK     |
| SUFU      | NPHP3    | AMPD3    |
| CBX5      | CEP63    | LRRFIP1  |
| FGD6      | ADAR     | GALNT10  |
| RAB3IP    | BRMS1L   | HLCS     |
| SPPL3     | RAB28    | GSR      |
| CCT8      | HMGXB3   | XRN1     |
| HINT3     | MTX2     | CANT1    |
| RAD1      | SFPQ     | SEPT11   |
| NCAPD3    | STAG2    | SERINC3  |
| CCNK      | RAB14    | ASB8     |
| ZNF468    | ERMP1    | C3orf64  |
| ATXN2     | STRADA   | GOLPH3   |
| C11orf61  | PPHLN1   | POC5     |
| ZNF514    | SAMD1    | ANKRD42  |
| C1orf83   | CAMK2G   | ATN1     |
| DNAJC21   | FOSL2    | SDCCAG1  |

|          |          |           |
|----------|----------|-----------|
| LUC7L3   | CHM      | DNAJB6    |
| WDR48    | MSH5     | PTAR1     |
| IDE      | IQGAP1   | THAP2     |
| FAM178A  | ZFAND3   | PHRF1     |
| ZNF274   | RGP1     | TSG101    |
| BTBD12   | TSR1     | RBMX      |
| AFG3L2   | PGBD2    | FBXO45    |
| TANC1    | AP4E1    | ARID4B    |
| ZNF644   | ITPR3    | POM121    |
| DCAF16   | PI4KB    | GNS       |
| PRRC1    | ZNF417   | XPOT      |
| DOT1L    | LMAN2L   | ARHGAP1   |
| LMTK2    | ARFGF2   | C2orf43   |
| ZNF329   | ABCC1    | AMMECR1L  |
| MBD6     | GCN1L1   | ERC1      |
| TRIM13   | METTL8   | TRMT5     |
| TMEM131  | PLCB3    | C17orf63  |
| IFT81    | IQCB1    | ZNF500    |
| ANKRD49  | TAF1A    | KIAA0562  |
| CHMP2B   | GLTSCR1  | ARMCX5    |
| UBE2N    | AIMP1    | NEK7      |
| VRK2     | FRG1B    | PDPK1     |
| ZNF480   | GSK3A    | EIF2C1    |
| DGCR8    | MREG     | RGPD4     |
| SYNJ2BP  | KIAA0528 | CSTF2     |
| BLZF1    | PTPN2    | DENR      |
| PSPC1    | FBF1     | BFAR      |
| LIN7C    | KAT5     | BACH1     |
| UGCG     | PGBD3    | CYB561D1  |
| ZRANB3   | LIPT1    | SPATA13   |
| ATN1     | VPS37B   | MKL1      |
| ZNF700   | PPP5C    | LIG3      |
| SMAD5    | DAXX     | VHL       |
| ZNF638   | CDAN1    | CCDC109A  |
| ACTR10   | CDC23    | TFE3      |
| C12orf4  | AKAP8    | NCSTN     |
| PRIM2    | HARS2    | C2orf69   |
| TOR1AIP1 | UBE2V1   | C15orf44  |
| DMXL1    | POLG2    | MYSM1     |
| KIAA0391 | TRMT61B  | PWP1      |
| FAM76A   | ANKRD10  | CDK2      |
| IGF2R    | SOS2     | PLEKHA2   |
| RBM15B   | SENPA6   | USP10     |
| ZUFSP    | ZBTB39   | GATAD2A   |
| SFRS17A  | HIVEP2   | MASTL     |
| TAF5L    | DCUN1D4  | MAPK9     |
| CYSA     | PPP2R5E  | AGK       |
| RAB8B    | MMGT1    | RABGAP1   |
| DYM      | KIAA1009 | MYCBP2    |
| JHDM1D   | ZNF320   | TXNDC9    |
| MAN2A1   | FAM126B  | ZNF131    |
| PHACTR4  | MED25    | MSH6      |
| PNRC2    | FTSJD1   | C20orf177 |
| SENPA2   | CCNK     | RAD18     |
| HNRNPA3  | IFT74    | YWHAH     |
| SEMA5A   | KDM5B    | PCBP1     |
| TTC30A   | PPP1R13L | LRRC42    |
| C5orf42  | METTL14  | SPAG9     |



|           |           |              |
|-----------|-----------|--------------|
| GEN1      | BMP1      | PSMD2        |
| ATXN7L3B  | SNAPC3    | DOCK1        |
| SNX19     | USP28     | PHF2         |
| CEP120    | PANX1     | PPP1R9B      |
| SET       | BTBD12    | IL17RA       |
| MTF2      | METT10D   | PIAS4        |
| ZBTB40    | ZNF558    | C4orf46      |
| MTA2      | TAX1BP1   | PPM1D        |
| ALKBH1    | SYS1      | ERI1         |
| SNIP1     | ESF1      | PKD2         |
| FAM102B   | NCBP1     | SFRS3        |
| COL4A3BP  | LOC90784  | LMBRD2       |
| ZNF195    | TM2D1     | SGTB         |
| C12orf26  | FBXO18    | GFM1         |
| ATG4C     | ANXA4     | CNNM4        |
| RELA      | GAB1      | HNRNPH3      |
| UBQLN1    | KIAA0802  | PSMD14       |
| UBA5      | CDK14     | MTPAP        |
| PIGO      | PSMD5     | PTPRK        |
| DAPK1     | R3HDM2    | TTLL12       |
| CEP250    | SCRN1     | CLINT1       |
| KIAA0355  | ELF1      | TROVE2       |
| NKTR      | CCDC14    | PIGS         |
| FAM120AOS | FUT11     | PRPF38A      |
| TRPM7     | C20orf43  | SEPT8        |
| NECAP1    | KIAA1712  | AKAP13       |
| OSBPL2    | ASB8      | C4orf14      |
| ZBED5     | POLA1     | ELMO2        |
| EHF       | ZNF773    | IPO9         |
| ZNF202    | DPY19L4   | LOC100132707 |
| CMIP      | NUP62     | FAM161A      |
| CDKN1B    | ACTN4     | PPID         |
| DDX42     | HERC2     | GPR157       |
| ZNF546    | AGGF1     | SPATS2L      |
| ZNF45     | PEX26     | HEATR5A      |
| FAM83G    | HDAC4     | PRMT5        |
| ARF3      | SLAIN2    | TACC1        |
| RALGAPA1  | SLC35E1   | IPPK         |
| SLC39A6   | DDX1      | KLC2         |
| SLC10A7   | WDR45L    | VMA21        |
| CHD1      | USP36     | NEK9         |
| RAB33B    | SFRS12IP1 | STX6         |
| CTDSP2    | TCOF1     | JRKL         |
| PTP4A2    | RNF141    | TNKS         |
| SFRS6     | DSG2      | NUP50        |
| FAM199X   | IFT80     | SFRS2        |
| FAM20B    | PDPR      | RBM22        |
| IPPK      | CHIC2     | CASZ1        |
| SCLT1     | RAD17     | CSNK1G3      |
| PTPRG     | LRRC16A   | BTG3         |
| UBE2H     | HNRNPH2   | CCDC88A      |
| RAD50     | FBXL14    | PGGT1B       |
| TM9SF2    | EIF1AX    | MRFAP1       |
| TUBGCP5   | HBP1      | RERE         |
| EXOC8     | MKLN1     | FAM21A       |
| FBXO5     | NCSTN     | HTATSF1      |
| PGBD2     | NPNT      | GATSL1       |
| CDC42SE2  | C16orf72  | ELK3         |

|          |           |         |
|----------|-----------|---------|
| CDC5L    | ZBED4     | GALNT1  |
| ERN1     | C14orf43  | TLL5    |
| STXBP3   | PPM1G     | STT3B   |
| BTG3     | BMI1      | TUG1    |
| PIGX     | CNOT3     | METTL8  |
| USP7     | ZNF473    | ZC3H7A  |
| LRBA     | SLC37A3   | DTX3L   |
| ZFAND6   | KIAA1797  | ZNF234  |
| ARFGAP3  | CCDC102A  | MLLT1   |
| SYPL1    | BCL2L2    | HNRNPM  |
| WHAMM    | MAPK9     | WTAP    |
| ASCC3    | CSNK1G2   | ETNK1   |
| MAGI3    | PEX13     | ZNF398  |
| MCM3     | ZSWIM6    | MSL1    |
| PDE8A    | FCHSD2    | DIP2A   |
| NAPEPLD  | ZNF195    | CNOT1   |
| TP53BP1  | ZC3H18    | SNX25   |
| PTCH1    | SRCIN1    | FBXL20  |
| HNRNPM   | PRPF4     | KAT5    |
| ZNFX1    | C12orf26  | CEP290  |
| C6orf72  | PLAGL2    | PLEKHB2 |
| GGA2     | SRFBP1    | MPP6    |
| ZSWIM1   | CIZ1      | CIRH1A  |
| PTCD3    | TCF7L2    | RNF10   |
| KLHL7    | PNN       | TBC1D23 |
| SH3PXD2A | ZNF673    | PRKCI   |
| HMBOX1   | ARHGAP21  | TRAF3   |
| SLC37A1  | WDR19     | SENP6   |
| SNW1     | HNRNPA0   | CCDC111 |
| STK24    | ZNF74     | ZNF587  |
| DCTN4    | C10orf119 | SERBP1  |
| PPP5C    | KCMF1     | ANLN    |
| RPRD1A   | MTMR15    | ZNF280C |
| MCM4     | ZNF189    | GUSBP1  |
| CNNM3    | PACSIN2   | RAD1    |
| RYBP     | ZNF639    | PRMT10  |
| ZNF416   | ZBTB43    | METTL2A |
| SCOC     | ZCCHC7    | TMED10  |
| KIAA1143 | NHEJ1     | GNA12   |
| TEX261   | MAPKAPK5  | ARL1    |
| STX7     | PHF6      | GON4L   |
| DCUN1D4  | MAP3K2    | ZNF836  |
| XPO1     | RPA1      | RHOA    |
| RAB12    | CELSR1    | SUN1    |
| ZMIZ1    | TBC1D10B  | ZNF281  |
| E2F3     | STRN      | RPRD2   |
| FTSJD1   | ERCC5     | SMYD4   |
| ZNF740   | SNAPC1    | ATP6V1D |
| FAM122A  | UBE2W     | MAX     |
| ZNF33B   | ALS2CR4   | TPM3    |
| TSC1     | C14orf79  | UBE2N   |
| IARS     | ANKRD36   | YTHDC2  |
| CFLAR    | TAF8      | NEO1    |
| ZMPSTE24 | ACAP2     | WDR44   |
| ZNF91    | TBC1D15   | TNPO2   |
| WASL     | LOC253039 | COG7    |
| HLTF     | C10orf84  | ZNF20   |
| TRIM23   | NKRF      | SOAT1   |

|           |           |          |
|-----------|-----------|----------|
| KLHL23    | FAM135A   | HNRNPC   |
| NEU3      | LSG1      | ZNF174   |
| STXBP5    | MAPK14    | C12orf51 |
| KPNA1     | C2orf24   | MCM3AP   |
| C10orf88  | ZNF71     | PRRG1    |
| ESF1      | C17orf42  | ZC3H6    |
| FGFR1OP2  | PAQR5     | FTO      |
| LGR4      | DIS3L     | HSPA14   |
| TM9SF4    | C11orf46  | TMEM87A  |
| MDC1      | SFRS11    | ELAVL1   |
| ZNF160    | METTLL2B  | BNIP3L   |
| STAMBP    | RAB35     | METTLL13 |
| SAV1      | SMCHD1    | RAB1A    |
| ZADH2     | GEMIN4    | FBXO38   |
| C5orf24   | ZNF862    | ZBTB25   |
| UBLCP1    | FAM102A   | FNIP1    |
| PLEKHA3   | ATP9A     | CLDND1   |
| SDHAP1    | RNF216    | SPEN     |
| DENND4A   | CCNT1     | TAF6     |
| SOAT1     | NUP107    | PNRC2    |
| ZNF184    | KIF13A    | RAD21    |
| CCDC142   | ATXN1     | C11orf9  |
| THAP2     | NUP205    | TNS3     |
| VPS37C    | TMEM184C  | RELT     |
| ACVR1B    | ANKS3     | NRF1     |
| MDN1      | HNRNPA1   | MAP4K3   |
| HELQ      | RAC1      | ELF4     |
| ATAD1     | C10orf46  | HERC3    |
| OTUD3     | MAPKAP1   | KIAA1429 |
| ZNF432    | WDR43     | GRK4     |
| ACVR2A    | FOXJ2     | C18orf19 |
| ITGB1     | C10orf76  | HOOK1    |
| PSIP1     | NPRL3     | NMT1     |
| C12orf32  | CXXC5     | CNOT3    |
| NCOA5     | SCAPER    | ZBTB40   |
| C2orf43   | CBFB      | HDLBP    |
| LRRC37B   | RNF26     | FAM65A   |
| SRP54     | C5orf44   | MACF1    |
| SLBP      | SCARB2    | RPL7L1   |
| PDCD10    | LOC400027 | CCT2     |
| ZNF140    | PVRL3     | BCL2L2   |
| MTMR2     | C15orf40  | PCNX     |
| STK35     | RAB1B     | PITPNA   |
| SMC5      | WDR89     | ZSWIM6   |
| SUCLA2    | XPC       | ZNF195   |
| GPBP1L1   | TRAF7     | CUL1     |
| BTBD9     | POLR1A    | PGAM5    |
| ADRBK1    | KIAA0319L | LATS2    |
| TRIM4     | SUPT16H   | DBF4B    |
| RBM5      | AAAS      | SLC35E3  |
| ADSS      | AP1S3     | SAPS1    |
| HECA      | XPO6      | MKNK1    |
| MASTL     | RAB2B     | EP400    |
| FAM190B   | ABCA11P   | IMMT     |
| LOC729082 | KIAA1731  | DSTYK    |
| TAF13     | ZNF550    | ANAPC10  |
| SASS6     | CNNM3     | PTTG1IP  |
| STIL      | ST3GAL5   | NAE1     |

|          |          |          |
|----------|----------|----------|
| WDR35    | TSSK6    | RIOK2    |
| ZNF841   | ZNF225   | CCPG1    |
| PLAGL2   | SCOC     | PHF15    |
| ZNF319   | ZBTB2    | EIF1AD   |
| ANGEL2   | WDR75    | VCPIP1   |
| RNGTT    | DCLRE1B  | RPL13P5  |
| ZNF673   | DYRK2    | ZBTB43   |
| RIC8A    | CDC42SE1 | ZNF292   |
| IPO5     | ABCE1    | NOLC1    |
| PRKACB   | ZNF213   | SEP15    |
| ZXDC     | TMEM51   | CENPC1   |
| RUNDC1   | PABPC4   | POC1B    |
| METAP1   | KLHL12   | CHD9     |
| ZBTB24   | ANKRD5   | DDX50    |
| GTF2H1   | MON2     | USP38    |
| TMEM167B | PRKRA    | KIAA0831 |
| INPP4A   | ZNF718   | MBTPS2   |
| LYRM2    | LRRC37B2 | KIAA0895 |
| ARHGEF7  | MOBK2B   | ZNF532   |
| ATP13A3  | TMEM79   | SMAD3    |
| ZWILCH   | ZNF780B  | DENND5B  |
| ZNF138   | SNURF    | MTUS1    |
| CRY1     | IARS     | KIF3B    |
| ILF3     | EHMT1    | PIK3R4   |
| PRPF38A  | PEX12    | DEDD     |
| ZSCAN22  | RCBTB1   | ZNF619   |
|          | AFF1     | NCBP2    |
|          | TRIM23   | RHBDF2   |
|          | DDX47    | ZFAND3   |
|          | CHMP4B   | RARS     |
|          | LMTK2    | DIS3L    |
|          | SLC35A4  | STRN4    |
|          | NUP98    | NPC1     |
|          | TSEN2    | UTP14C   |
|          | KLHDC5   | TXNDC12  |
|          | DDR1     | KIAA1841 |
|          | METT3    | ALG10B   |
|          | ZNF799   | C1orf26  |
|          | TPM3     | TRIM34   |
|          | NCDN     | YRDC     |
|          | ANKLE2   | ATXN1    |
|          | ZMYM5    | NUDCD3   |
|          | TCFL5    | ABCC1    |
|          | NCK2     | MMADHC   |
|          | WDR26    | POLD3    |
|          | NDE1     | COIL     |
|          | C6orf89  | TUFT1    |
|          | ETV3     | GMIP     |
|          | LPCAT4   | CSNK1D   |
|          | ZNF160   | UBAP1    |
|          | NUMB     | IQCB1    |
|          | HIP1R    | MYLIP    |
|          | RAB40C   | C12orf43 |
|          | SSH3     | ALG10    |
|          | RFFL     | C6orf72  |
|          | ZNF689   | UTP11L   |
|          | FLII     | RAPGEF6  |
|          | RBMS1    | TNRC18   |

|          |           |
|----------|-----------|
| DDX27    | TLK1      |
| ZNF8     | UNC119B   |
| TLL1     | RHOQ      |
| ZNF318   | ATP6AP2   |
| NDNL2    | CDC23     |
| ZNF566   | TRIM62    |
| CAP1     | RBM33     |
| BCL2L13  | PDCD7     |
| SFRS7    | C1orf52   |
| RBM8A    | TDG       |
| E2F6     | MON2      |
| GTF2H3   | MARS      |
| TMEM168  | FGD6      |
| CLCF1    | KBTBD7    |
| ZNF420   | RAB3IP    |
| MRPL10   | SPPL3     |
| BET1L    | ARL6IP6   |
| DLGAP4   | SNN       |
| PRRG1    | NCAPD3    |
| ZNF7     | TBC1D8    |
| RBM9     | ATXN2     |
| FNTB     | FBXO30    |
| EIF3A    | MED13     |
| ZNF606   | KIAA1967  |
| DCAF10   | GORASP2   |
| RAB9A    | LIMK1     |
| RNF114   | ZNF440    |
| SEC23B   | WASL      |
| ARMCX5   | ZNF749    |
| SOCS6    | TARS      |
| KCTD5    | C17orf75  |
| USP9X    | CARD6     |
| PRUNE    | VPS39     |
| ZKSCAN4  | TMEM184B  |
| ARHGAP19 | DNAJC6    |
| UBE4A    | C14orf135 |
| ANKFY1   | METTL9    |
| ZFYVE26  | SP100     |
| RAD21    | TMEM17    |
| RNF13    | ALKBH8    |
| ING3     | FCHO2     |
| CDC42BPA | TTC3      |
| KDM2A    | ANKRD26   |
| GCFC1    | ZMYM5     |
| COG8     | FBXO3     |
| UBOX5    | FBRS      |
| UBE2O    | PLBD2     |
| DDX17    | NLK       |
| MAFG     | PURA      |
| ADAT1    | TMEM43    |
| TMEM50A  | LRCH1     |
| FTSJD2   | SPRED2    |
| ZBTB40   | SESTD1    |
| RPL7L1   | ZADH2     |
| PCNX     | UGCG      |
| MRFAP1L1 | PSMA1     |
| KIF21A   | ZNF778    |
| SETD6    | SEPT9     |

|           |              |
|-----------|--------------|
| LOC151162 | BCL2L13      |
| CXorf38   | ZNF260       |
| TYW3      | ZNF512       |
| PPME1     | LYN          |
| CYB5RL    | UBE2R2       |
| SMG6      | NCAPD2       |
| USP22     | WWTR1        |
| MAP2K1    | CANX         |
| DAPK1     | E2F6         |
| USP1      | GTF2IRD1     |
| ZFP14     | ZNF592       |
| KIAA0317  | DCTD         |
| ITFG2     | SUSD1        |
| WDR12     | ZNF420       |
| PLEKHM1P  | H2AFY        |
| MITD1     | FXC1         |
| YWHAH     | TMEM69       |
| PCBP1     | WDTC1        |
| C10orf28  | VPS54        |
| TNRC6A    | BUD13        |
| ZNF808    | RSL1D1       |
| CEP110    | RAB8B        |
| KIAA0226  | CAPZA2       |
| MYH9      | C14orf169    |
| TAF2      | SLBP         |
| NRAS      | PPP2CB       |
| ZNF585B   | ERLEC1       |
| REV3L     | INTS9        |
| CCDC123   | NAA30        |
| NEDD1     | HNRNPA3      |
| MED23     | ZNF33A       |
| GIT1      | SUCLA2       |
| DR1       | ATP8B1       |
| EIF2AK1   | UBXN2A       |
| NT5C2     | RWDD4A       |
| NOLC1     | AP3M2        |
| ZNF562    | GCA          |
| ELMO2     | GPATCH2      |
| TOB2      | TRMT6        |
| SPIN2B    | RBBP6        |
| FPGT      | GPBP1L1      |
| DCTN1     | XIAP         |
| KIAA0652  | TAOK2        |
| E2F4      | GK5          |
| TBCCD1    | ACLY         |
| CRLF3     | COG8         |
| SLC25A24  | MUS81        |
| RBM4B     | METTL6       |
| IFT172    | LOC100129034 |
| SKI       | TMEM167A     |
| MBTPS2    | C16orf72     |
| ZNF532    | NSMAF        |
| FAM168A   | ADSS         |
| VMA21     | TTC4         |
| RCN2      | PMS2CL       |
| TBC1D12   | STX17        |
| CMTM1     | IL6ST        |
| CLK2      | CIZ1         |

|           |           |
|-----------|-----------|
| CCDC76    | PIGO      |
| LLGL1     | CNOT6L    |
| RAPGEF1   | UBE2G1    |
| MAP3K8    | TMEM39A   |
| UNK       | LOC550112 |
| EXOC8     | C17orf80  |
| MTCH1     | FAM120AOS |
| SLC35C2   | PTPRF     |
| DEDD      | RDH14     |
| FIGNL1    | ENTPD1    |
| COPS8     | UBFD1     |
| SDF2      | PPPDE1    |
| VANGL1    | EDC3      |
| PAIP1     | REV3L     |
| C15orf52  | SIPA1L3   |
| DNAJC5    | HNRNPUL1  |
| USP19     | UBE2D1    |
| C9orf102  | NIN       |
| PPL       | GNPTAB    |
| ZNF107    | UBE2E1    |
| UBE2Q2    | SPATA5    |
| GNA13     | PLXNA1    |
| PPP3CB    | HS2ST1    |
| YTHDF2    | POLG      |
| CD47      | EHBP1L1   |
| LETMD1    | ALG9      |
| SLC30A9   | CGRRF1    |
| SDCCAG8   | SLC25A24  |
| ILF2      | URGCP     |
| CAMK2D    | CLIC4     |
| SEMA4B    | OBFC1     |
| LDOC1L    | ATXN7L3   |
| CPEB2     | BMPR1A    |
| MYO19     | C10orf84  |
| MSH2      | NEK4      |
| C14orf4   | FYCO1     |
| GIT2      | RAB14     |
| HIPK1     | VIPAR     |
| RPS6KB1   | LLGL1     |
| FAM38B    | KIAA1524  |
| IGSF3     | FBXL19    |
| SRPK1     | PPP1R2    |
| TIAL1     | PTPN21    |
| EIF2AK2   | NGLY1     |
| C5orf51   | DZIP3     |
| RAB11FIP5 | C7orf25   |
| LOC729678 | FAM48A    |
| NARS      | CCDC112   |
| AAK1      | ITPR3     |
| PKD1      | CDK11A    |
| KIAA1522  | PALLD     |
| DCBLD2    | ERLIN2    |
| KIAA1530  | ERO1L     |
| BCAR1     | LSM12     |
| C1orf52   | ARL2BP    |
| SH3BP5L   | PJA2      |
| MRPL3     | ZC3H12C   |
| ZNF490    | FAM91A1   |

|              |          |
|--------------|----------|
| H3F3B        | NACC1    |
| VT11A        | PITPNM1  |
| BRCC3        | MAST2    |
| ZNF468       | BBS10    |
| PRKDC        | NR3C1    |
| POFUT2       | NAPEPLD  |
| SMCR7        | NIPAL2   |
| APEX1        | ANXA5    |
| CDC27        | SCAMP1   |
| ZNF664       | TMEM30A  |
| LOC100132247 | GSK3A    |
| C1orf124     | PRKCA    |
| REPIN1       | KIAA0528 |
| C6orf134     | TIAL1    |
| UGGT1        | AGTPBP1  |
| HPS6         | DUS4L    |
| ZNF274       | PHAX     |
| PRKAR1A      | ATP5A1   |
| STAG3L3      | HAUS1    |
| CLTC         | WDR33    |
| SNAPIN       | RAB2B    |
| C2orf29      | UBE2A    |
| ZNF180       | TTC33    |
| THUMPD2      | ABLIM1   |
| ALKBH8       | LAPTM4A  |
| UBE3C        | KATNAL1  |
| FRMD4B       | RBM19    |
| XPO5         | MYO18A   |
| SCYL3        | CASP7    |
| KDM6A        | UTP23    |
| HDHD2        | LASP1    |
| UNKL         | DFFA     |
| GALNT10      | XPO1     |
| NFE2L3       | KHSRP    |
| TRIM11       | PLEKHM2  |
| ZNF585A      | DNAJC24  |
| DET1         | STK38    |
| CDC42EP4     | KIAA1704 |
| LRCH1        | FAM126B  |
| ACP1         | YIPF6    |
| STAG3L2      | C1orf9   |
| DEK          | KDM5B    |
| PSPC1        | METTL14  |
| MCPH1        | ZNF268   |
| SERINC3      | EIF2C2   |
| COQ7         | IFIH1    |
| FAM192A      | ELP2     |
| FLJ10357     | ANXA7    |
| NCEH1        | AFF1     |
| FAM188A      | TRIM23   |
| ZNF518A      | MLL      |
| DENND4A      | C5orf15  |
| LOC678655    | BTRC     |
| PHRF1        | DHX30    |
| AP3M1        | NXF1     |
| ZNF700       | TES      |
| SLC38A1      | SNTB2    |
| C9orf80      | SMCR7L   |



|              |          |
|--------------|----------|
| DCTD         | DOCK9    |
| SPRYD3       | HIF1AN   |
| POM121       | IPO11    |
| ZNF200       | DLD      |
| RXRB         | C2orf44  |
| NUP155       | EIF4A3   |
| LOC284441    | NFAT5    |
| HIPK3        | MAST4    |
| INPPL1       | HIP1R    |
| UXS1         | FECH     |
| SFRS4        | ZMIZ2    |
| ZNF772       | FUBP3    |
| WDR90        | MRPL19   |
| TOP2B        | CS       |
| PCSK7        | ZNF318   |
| UBE2E3       | NDNL2    |
| KIAA1407     | DDX19A   |
| MPHOSPH8     | WWP2     |
| TULP4        | PMS2     |
| PFKFB3       | ATAD1    |
| NSUN3        | PIP4K2B  |
| PHLPP1       | NOMO1    |
| ARPC2        | UBQLN2   |
| ZNF140       | C4orf43  |
| NBEAL2       | CASP8AP2 |
| TAF6         | INPPL1   |
| SFRS15       | FAM76A   |
| SMURF1       | POP1     |
| ZNF302       | SSR1     |
| ANKRD36BP1   | BRD2     |
| ZCCHC8       | HINFP    |
| SPATA13      | IGF2R    |
| NAA25        | TBC1D14  |
| C11orf9      | CENPO    |
| C5orf42      | TULP4    |
| STAU2        | DCTN6    |
| AP3M2        | SFRS15   |
| DSTN         | HNRPDL   |
| SFRS14       | YAP1     |
| FRS2         | C5orf42  |
| C17orf85     | C12orf66 |
| CCDC109A     | PPP1R15B |
| PARP4        | CHMP1B   |
| C4orf10      | STRN3    |
| ADD1         | SETBP1   |
| TRIP10       | ADRBK1   |
| KIAA1429     | KIAA0513 |
| PACS1        | PDP2     |
| LOC100129034 | UBE2O    |
| C20orf117    | ZBED4    |
| TTC14        | MAFG     |
| NMT1         | TAB3     |
| RAB10        | KIAA1432 |
| TSTD2        | ZNF473   |
| GMEB1        | FAM105B  |
| MTA2         | FAM40A   |
| ITGB4        | PTGES3   |
| YTHDF3       | INTS8    |

|           |          |
|-----------|----------|
| RNF34     | MORC3    |
| BCL9      | PEX13    |
| PTGES3    | TTF1     |
| IFFO2     | SFRS12   |
| SYNGR2    | ERCC6    |
| INSIG2    | UBA5     |
| GCC1      | RASAL2   |
| KIAA0907  | TMX2     |
| NDST2     | TCP11L2  |
| TXNDC9    | ZNF28    |
| EFTUD1    | PIGW     |
| TCP11L2   | DCTN2    |
| GTF3C1    | KPNA3    |
| NOTCH1    | YTHDF1   |
| HERPUD2   | RHEB     |
| SPPL2B    | C1orf55  |
| DRAM2     | MARK3    |
| NFATC3    | SPOP     |
| GTF2H1    | PIP4K2A  |
| BAT1      | STX18    |
| R3HDM1    | CEP110   |
| LIN54     | MPP5     |
| THOC2     | DYNC2LI1 |
| THBS3     | NCOA2    |
| ZNF707    | AZI2     |
| SRGAP2    | GYG1     |
| CRIM1     | VGLL4    |
| ZNF546    | PGK1     |
| FAM149B1  | SNX4     |
| CLASP2    | NCAPG2   |
| GZF1      | SRGAP2   |
| RALA      | FAM53C   |
| ABCC10    | ILF3     |
| SCRN3     | TXLNA    |
| HGSNAT    | FUT10    |
| NDRG3     | CLASP2   |
| LOC645676 | CPNE8    |
| EIF2C4    | GIT1     |
| APBB2     | RBM47    |
| ZDHHC6    | POMT2    |
| FUT4      | SNRNP40  |
| AGPS      | KIAA1310 |
| SEPHS1    | PNMA1    |
| ZNF614    | CHD1     |
| C9orf30   | CADPS2   |
| SOCS4     | SEPHS1   |
| TMEM132A  | KIAA0652 |
| DDX50     | CALCOCO2 |
| ZFYVE9    | ACER3    |
| ZNRF3     | EXOC4    |
| PANK2     | LCLAT1   |
| TUBGCP5   | NCOR1    |
| BMP2K     | TOMM70A  |
| SENP5     | FBXL3    |
| GTF2E1    | NKRF     |
| SLC26A11  | PELI1    |
| FAM200B   | PPT1     |
| KCTD20    | TLR3     |

|           |          |
|-----------|----------|
| PIK3R4    | FTSJ2    |
| GDAP2     | WDSUB1   |
| MARCH6    | PIGX     |
| MRPL49    | RBM15    |
| METT5D1   | AMZ2     |
| TMEM2     | PCGF3    |
| WNK1      | POLE3    |
| PPP1R13B  | USP7     |
| KIAA2018  | RACGAP1  |
| STARD13   | USP4     |
| SLC35A5   | ZNF417   |
| KIAA0586  | DYRK3    |
| FAM22D    | NUPL2    |
| PIGK      | GLS      |
| TTC27     | TRAFD1   |
| LSM14B    | RANBP9   |
| TRIM34    | DPYSL2   |
| IKBKB     | SDCCAG8  |
| MAPK8     | CPSF7    |
| SYPL1     | RALGAPA2 |
| DCAKD     | CHST14   |
| RNF11     | TADA2A   |
| PGS1      | TFG      |
| MCM3      | PARP1    |
| PLEKHA1   | TPM4     |
| NAPEPLD   | ZNF674   |
| PER2      | HECTD3   |
| C11orf30  | ADCY6    |
| FAM60A    | RRM1     |
| TOP1P1    | RAVER2   |
| GNAQ      | CRK      |
| UBP1      | CDK19    |
| B3GALNT2  | UBP1     |
| ETV6      | GGA2     |
| UBE2D2    | ZNF192   |
| ZNF192    | RPS6KB1  |
| CORO2A    | ANAPC4   |
| EXOC2     | SRPK1    |
| HP1BP3    | C4orf29  |
| KCTD13    | FAM18B   |
| LOC220729 | AHR      |
| AVL9      | CCT4     |
| STK24     | KIAA0753 |
| DCTN4     | TRMT2B   |
| WDR33     | SETD3    |
| SNAPC5    | GPBP1    |
| SGSH      | STK10    |
| TAF1C     | C16orf63 |
| ANXA2P1   | DYNC1L1  |
| WRNIP1    | FASTKD5  |
| ZNF823    | BBS4     |
| CALCOCO1  | KTI12    |
| KIAA0467  | ZNF567   |
| RHBDD1    | ZNF225   |
| IQCK      | PTPRE    |
| PLCG1     | C18orf8  |
| TSGA14    | CRYZL1   |
| PRKCI     | DCBLD2   |

|           |          |
|-----------|----------|
| ZNF175    | KIAA1530 |
| SUPT5H    | SOS2     |
| ZNF641    | MARCH5   |
| HIRA      | DBF4     |
| TSNAX     | PLS1     |
| TNS1      | RUVBL1   |
| GART      | TNFAIP1  |
| DHFRL1    | SUFU     |
| DAB2IP    | TOR1AIP2 |
| SPATA20   | SLFN5    |
| RAB12     | PRKRA    |
| GPD2      | BBS1     |
| DDX58     | TEX2     |
| ANKRD27   | ZNF468   |
| ZNF613    | BCAS2    |
| SERBP1    | SNURF    |
| DAAM1     | TMEM38B  |
| ZNF37B    | RCBTB1   |
| ZNF280C   | ASB3     |
| GOLGA6L10 | ZNF527   |
| ANXA2P2   | LITAF    |
| MOGS      | SIRPB1   |
| NCAPD3    | KPNA1    |
| SNX13     | FMNL3    |
| STK3      | TRIM13   |
| MAVS      | CYTH3    |
| ZNF322A   | GXYLT1   |
| KIAA1967  | NMD3     |
| OTUB1     | REXO2    |
| PPIP5K2   | PPCS     |
| FAM118B   | PWP2     |
| TRAK1     | KDM6A    |
| GOLPH3L   | KIN      |
| PTPN11    | NUP133   |
| TAF1B     | ZBTB41   |
| DHX30     | AHCTF1   |
| SUN1      | DNASE1L1 |
| ZNF410    | FBXL17   |
| GATAD1    | SLC26A2  |
| KIAA2026  | NUMB     |
| SH2D3A    | SH3RF1   |
| PPM1B     | RFFL     |
| ANKRD50   | UBAP2    |
| SPINT1    | SSR3     |
| TMEM17    | TMEM214  |
| IPO11     | VPS33B   |
| RNF40     | TCEB3    |
| AACS      | DKC1     |
| TERF2IP   | SMC2     |
| ACBD3     | MTA3     |
| CETN3     | PAFAH2   |
| ANKRD49   | SFRS7    |
| LRRFIP1   | DTWD1    |
| MAGEF1    | NUP62    |
| PDCD6     | ZNF200   |
| DHX38     | VPS33A   |
| ZFYVE16   | NDUFS1   |
| SPRED2    | ASCC1    |

|           |           |
|-----------|-----------|
| MMS19     | CYB5R4    |
| POC5      | ZFP90     |
| CDR2      | C7orf28A  |
| CLCN2     | KIAA0182  |
| RRAGA     | LRRC37B   |
| SEPT9     | ZDHHC13   |
| CCDC127   | RNF24     |
| TRAPPC10  | ABCA2     |
| ZNF174    | USP12     |
| APH1A     | RBM15B    |
| NCAPD2    | MCM8      |
| MCM3AP    | FNBP1     |
| WWP2      | RC3H1     |
| FAM21C    | PHF3      |
| PMS2L4    | HAUS6     |
| AP3S2     | NECAP2    |
| RIOK1     | DSG2      |
| ZNF484    | LOC651250 |
| ATAD1     | SENP2     |
| LOC642826 | EDC4      |
| UBQLN2    | WDHD1     |
| PRIM2     | RAD17     |
| TMEM69    | WDR55     |
| MOBK2A    | LRRC16A   |
| SLC30A7   | AMD1      |
| UQCC      | GPSM2     |
| VPS35     | ATXN10    |
| C2orf64   | RBM17     |
| PLD2      | UFM1      |
| FTO       | FBXL14    |
| ZDHHC13   | MGC57346  |
| RNF160    | CLK3      |
| RGNEF     | BTBD9     |
| MAP3K7    | ARHGAP29  |
| RG9MTD2   | TMEM50A   |
| RUFY3     | TTC14     |
| TBC1D14   | ACTN1     |
| EXOC5     | YTHDF3    |
| MED29     | MBTPS1    |
| DVL2      | SNX10     |
| FNIP1     | C9orf6    |
| MYO5B     | NRBP1     |
| ATF7IP    | MRFAP1L1  |
| MRPL44    | UACA      |
| CYP20A1   | PTER      |
| ZNF708    | SMEK1     |
| ZNF446    | AMIGO1    |
| ABCF2     | SACM1L    |
| GMFB      | FAM172A   |
| TRMT6     | USP22     |
| ACLY      | OLA1      |
| GTPBP2    | VTA1      |
| ZDHHC7    | KCTD1     |
| SNX5      | ALS2      |
| TWISTNB   | FAM111A   |
| METAP2    | PPP2R5B   |
| OGFOD1    | ALS2CR8   |
| ADSS      | UBE2MP1   |

|               |          |
|---------------|----------|
| CPSF2         | GATC     |
| LZTR1         | ZBED5    |
| MFSD6         | ZBTB34   |
| CCT2          | ZNF202   |
| PIK3C2A       | RAP1GAP  |
| NRBP1         | MARCH8   |
| PMS2CL        | CLP1     |
| GPR176        | KIAA0174 |
| MDM1          | SMC4     |
| SEH1L         | C1orf25  |
| STX17         | ZNF585B  |
| DBF4B         | ZNF621   |
| SLC35E3       | EPB41    |
| ZC3H10        | PRKRIR   |
| DDX3X         | LEPROTL1 |
| CSTF1         | TRIM8    |
| C13orf23      | PDCL3    |
| MRPL45        | TAOK3    |
| C1orf55       | PAWR     |
| DYNC1H1       | C1orf107 |
| YPEL5         | OGFRL1   |
| LRRC42        | HCG18    |
| DND1          | MED15    |
| ITGA6         | KDM2B    |
| SF3B2         | RCN2     |
| ZNF223        | ARHGAP17 |
| KIAA0556      | ARMC1    |
| ECT2          | PDE6D    |
| DUSP12        | FAM135A  |
| NUCKS1        | CD58     |
| ZNF691        | EXOC8    |
| MPP5          | RAP2B    |
| MANBA         | POLR2D   |
| INPP4A        | ZNF461   |
| C7orf64       | ATP6V1B2 |
| MANBAL        | ZNF642   |
| ZNF197        | DPH2     |
| JAG1          | LRRC40   |
| C1orf25       | MRPL49   |
| GOLGA1        | NOMO2    |
| SNX4          | TGFBR2   |
| JOSD1         | KPNA2    |
| HSDL1         | ZNF25    |
| RANBP3        | PHF16    |
| ZNF45         | DGKD     |
| CLINT1        | PGAM1    |
| ZBTB9         | C1orf103 |
| TROVE2        | ACOT9    |
| RCE1          | CALM2    |
| TMEM194A      | ZFX      |
| CUL2          | HN1L     |
| DKFZP586I1420 | GPRIN1   |
|               | SPAG1    |
|               | WHAMM    |
|               | RAC1     |
|               | PLCB3    |
|               | GUCY1B3  |
|               | CHUK     |

TAF4  
LDOC1L  
ZNF618  
TOP1P1  
NIP7  
CKAP2  
TNIP2  
VAMP3  
HBS1L  
RPF1  
TBC1D9  
UBE2D2  
SEC22A  
ATF6B  
PTCD3  
MAPKAPK2  
LHFPL2  
EED  
MFF  
MYO5C  
PTPN2  
TRAF7  
AKAP2  
KIAA0319L  
MAPK7  
IL10RB  
EIF4ENIF1  
NT5C3  
RNH1  
SPIN3  
MIS12  
ANXA2P1  
TYW1  
POLG2  
UBE2I  
ARIH2  
SLC4A7  
WSB2  
DAP  
ZNF613  
GLTP  
SLC33A1  
FBXO42  
ANXA2P2  
STK3  
TMEM5  
IFT74  
ZNF548  
CENPE  
H2AFV  
EXOC7  
TAF15  
GRIPAP1  
LOC647979  
LIMA1  
BZW1  
ZFP30  
LOC400657

ZNF558  
NCAPH  
ST3GAL2  
RMI1  
RNF220  
LNX2  
ZC3H11A  
TM7SF3  
GORASP1  
XPO5  
PARN  
PPP1R3D  
NCDN  
ANKLE2  
RDX  
NCK2  
WDR26  
C1orf183  
BRI3BP  
FANCM  
ZFYVE16  
KLHL26  
KIAA1712  
TUBGCP3  
NBEAL1  
ZNF248  
LNPEP  
FAM188A  
SEC31A  
CREBL2  
TPP1  
CCDC82  
LRRC59  
FAM21C  
BET1L  
MFSD11  
SLC6A6  
ZNF805  
TOR1AIP1  
LRRC37A4  
MCFD2  
ZNF786  
SRP54  
LRRC8B  
KTELC1  
AGBL5  
ETV1  
B3GNT2  
C9orf85  
UBE2E3  
FEM1B  
KIF16B  
PBRM1  
TFRC  
WHSC2  
SIAH1  
RNF13  
C7orf44



UBA1  
SPTBN1  
PQLC3  
ZNF84  
STXBP4  
C20orf117  
CAMTA2  
WDR73  
PARVA  
LRP10  
ZRANB2  
BRD1  
BBS2  
FBXO21  
TMEM65  
LOC729082  
KLF7  
NME7  
C12orf26  
FAM173B  
TBC1D25  
MYCBP  
MCM6  
KIAA0649  
UBR2  
NOTCH1  
AHDC1  
HERPUD2  
ZNF673  
UTRN  
WDR19  
RG9MTD3  
NR2F2  
RFC1  
STIP1  
UTP6  
ZWILCH  
PIP5K1A  
FAM83G  
SBF2  
KIAA1826  
GTDC1  
GOLIM4  
TMEM194A  
NT5C2  
CCT5  
ZNF828  
CLUAP1  
MUTED  
SLC10A7  
TOB2  
SNAPC1  
ASNSD1  
CENPJ  
ZFP36L1  
SKI  
ABCC5  
PTPRG

PSMD10  
NONO  
TBC1D8B  
DFFB  
PSMC6  
SAMD1  
MRPL35  
CAMK2G  
KIAA1737  
PTMA  
FIGNL1  
METT5D1  
FAM115A  
CRKL  
MESDC2  
KIAA1949  
KIAA2018  
TTC21B  
NEDD4L  
RUFY1  
COMMD8  
PPP3CB  
WDR53  
PPIC  
PGS1  
NUP214  
MAPKAP1  
PRPF19  
SMAD7  
DENND4B  
FNBP4  
CMPK1  
ZNF443  
PARD3  
ANO6  
CCDC115  
LOC441294  
CHORDC1  
SUPT16H  
CDC40  
SLC22A5  
C2orf67  
BAHD1  
MECOM  
RBM41  
ZNF416  
TNIK  
PKD1  
KIAA1522  
ATP11A  
KIAA1143  
WDR75  
NAA16  
PHC2  
ZNF259  
SNX7  
ZNF354B  
DCUN1D4

MUL1  
ENDOD1  
COMMD10  
PHF13  
ZAK  
MTRR  
LRRC37B2  
RANBP6  
ASAP2  
NFRKB  
CEP68  
TEP1  
TSC1  
SLC25A17  
EHD4  
PTPLB  
ZBTB17  
PRKAR1A  
GOPC  
ZC3H7B  
EIF2A  
PRPF18  
KLHDC5  
KLHDC10  
RNF40  
FAM114A1  
OSBPL8  
PRDM2  
ANKRD6  
OSBP  
RSU1  
MAP2K4  
ITGA2  
TCTN3  
PTPN23  
PDCD6  
TMEM50B  
HCFC2  
ZNF160  
ACP1  
DEK  
C5orf24  
FBXO22  
ZRANB3  
RCC2  
TMED2  
MRPS30  
ELK1  
USP21  
ACVR1B  
RBM8A  
UCHL5  
TMEM168  
GARS  
CCDC46  
CASP6  
ATG2B  
MAFK

ACVR2A  
GANAB  
MOBKL2A  
EAF1  
ARHGAP12  
FAM107B  
XYLT2  
INTS5  
USP40  
BUB3  
SCAND2  
PLSCR1  
KCTD11  
USP36  
ZUFSP  
TAF5L  
SMPD4  
FARSB  
KRAS  
OCIAD1  
HSP90AA1  
OGT  
CYP20A1  
NUMA1  
CCDC97  
COX15  
RAD23B  
SNX19  
KDM2A  
IDS  
LOC283267  
YBX1  
MTF2  
EIF2B1  
STT3A  
FBXW8  
LRRC37A2  
KIAA1217  
GPR176  
TGFB1  
POMGNT1  
FAM190B  
FTSJ3  
ARHGAP18  
SASS6  
TMCO4  
EFTUD1  
RABL3  
SAE1  
RNF19A  
CSRNP2  
MUDENG  
TMEM33  
HPS4  
ASTE1  
DND1  
NOL11  
ZBTB24

NUP35  
TYK2  
LYSMD3  
COL4A1  
USP5  
ZBTB3  
SLC39A1  
C7orf64  
TINF2  
ZNF45  
ZBTB9  
MTRF1L  
EWSR1  
LLPH  
TBC1D10B  
DKFZP586I1420  
SEMA4C  
FAM49B
